1 Running title: Canola Genetic Architecture for Manganese Tolerance

2

3 Genome-wide association study elucidates the genetic architecture of  
4 manganese tolerance in *Brassica napus*

5

6 Harsh Raman<sup>1\*</sup>, Zetao Bai<sup>2\*</sup>, Brett McVittie<sup>1</sup>, Sourav Mukherjee<sup>3</sup>, Hugh D Goold<sup>4,5</sup>,  
7 Yuanyuan Zhang<sup>2</sup>, Nay Chi Khin<sup>1,6</sup>, Yu Qiu<sup>1</sup>, Shengyi Liu<sup>2</sup>, Regine Delourme<sup>7</sup>,  
8 Barry Pogson<sup>6</sup>, Sureshkumar Balasubramanian<sup>3</sup> and Rosy Raman<sup>1</sup>

9

10 <sup>1</sup>New South Wales Department of Primary Industries, Wagga Wagga Agricultural  
11 Institute, Wagga Wagga, NSW 2650, Australia

12 <sup>2</sup>Oil Crops Research Institute-Chinese Academy of Agricultural Sciences,  
13 Wuhan, Hubei, China

14 <sup>3</sup>Monash University, Clayton, VIC

15 <sup>4</sup>New South Wales Department of Primary Industries, Elizabeth Macarthur  
16 Agricultural Institute, Woodbridge Road, Menangle, NSW, 2568, Australia

17 <sup>5</sup>School of Natural Sciences, Macquarie University, Sydney

18 <sup>6</sup>ARC Training Centre for Future Crops Development, Australian National  
19 University, Canberra, Australia

20 <sup>7</sup>INRA, Agrocampus Ouest, Université de Rennes 1, UMR1349 Institut de  
21 Génétique, Environnement et de Protection des Plantes, Le Rheu, France

22 \*Authors contributed equally

23

24

25

26

27 Corresponding author: Harsh Raman. NSW Department of Primary Industries,  
28 Wagga Wagga Agricultural Institute, PMB, Wagga Wagga, NSW 2650, Australia,

29 Email: [harsh.raman@dpi.nsw.gov.au](mailto:harsh.raman@dpi.nsw.gov.au)

30 **Abstract**

31 *Brassica napus* (canola) is a significant contributor to the world's oil production  
32 and is cultivated across continents, yet acidic soils with Al<sup>3+</sup> and Mn<sup>2+</sup> toxicities  
33 limit its production. The genetic determinants underlying acidic soil tolerance in  
34 canola are unknown and require to be uncovered for canola breeding and  
35 production. Here, through comprehensive phenotyping, whole genome  
36 resequencing, and genome-wide association analysis, we identified three QTLs  
37 for tolerance to Mn<sup>2+</sup> toxicity on chromosomes A09, C03, and C09. Allelism tests  
38 between four tolerance sources confirmed that at least one locus on A09  
39 controls Mn<sup>2+</sup> tolerance in *B. napus*. Integrated analysis of genomic and  
40 expression QTL and Mn<sup>2+</sup> tolerance data reveals that *BnMTP8.A09*, in  
41 conjunction with *BnMATE.C03*, *BnMTP8.C04* and *BnMTP8.C08*, play a central  
42 role in conferring Mn<sup>2+</sup> tolerance in *B. napus*. Gene expression analysis revealed  
43 a high correlation ( $R^2 = 0.74$ ) between Mn<sup>2+</sup> tolerance and the *BnMTP8.A09*  
44 expression. Yeast complementation assays show that *BnMTP8.A09* can  
45 complement manganese-hypersensitive yeast mutant strain *PMR1*Δ and  
46 restore Mn<sup>2+</sup> tolerance to wild-type levels. Inductively coupled plasma mass  
47 spectrometry revealed that Mn<sup>2+</sup> tolerant accessions accumulate less Mn in the  
48 shoots compared to Mn<sup>2+</sup> sensitives, suggesting that the *BnMTP8.A09*  
49 transporter likely sequesters Mn<sup>2+</sup> into the tonoplast. Taken together, our  
50 research unveils the genetic architecture of Mn<sup>2+</sup> tolerance and identifies  
51 *BnMTP8.A09* as a major gene imparting tolerance to Mn<sup>2+</sup> toxicity in *B. napus*.

52

53

54

55

56

57

58

## 59 **Introduction**

60 Soil acidity affects approximately 50% of the world's arable land and limits the  
61 production of crops, especially in tropical and subtropical regions (Kochian,  
62 1995). The projected effects of global climate change are likely to exacerbate  
63 Mn toxicity over the coming decades (Fernando and Lynch, 2015). At low pH  
64 (<5.5), exchangeable  $\text{Al}^{3+}$ ,  $\text{Mn}^{2+}$ , and  $\text{H}^+$  ions get solubilized into a solution form,  
65 which causes toxicities to plants. With growing global food demands, increasing  
66 productivity from the marginal and problematic soil is essential. The relative  
67 importance of each ion toxicity varies across soils with different chemistries:  $\text{Al}^{3+}$   
68 toxicity primarily inhibits root growth; while,  $\text{Mn}^{2+}$  toxicity causes interveinal and  
69 leaf margin chlorosis, brown and necrotic lesions, leaf cupping, and crinkling;  
70 with both result in reduced crop yield (Marschner, 1995, Foy, 1983, Bergmann,  
71 1992).  $\text{Mn}^{2+}$  toxicity can also result in the inhibition of net photosynthesis  
72 assimilation, accumulation of reactive oxygen species, disruption of the activity  
73 of critical enzymes, and impairment of absorption, translocation, and utilization  
74 of essential nutrients for plant growth, including  $\text{Ca}^{2+}$ ,  $\text{Fe}^{3+}$ ,  $\text{Zn}^{2+}$ , and  $\text{Mg}^{2+}$  (Horst,  
75 1988, Bloom and Lancaster, 2018, Li, 2021). Extreme climatic conditions such  
76 as waterlogging with low redox potential, water deficit, and heat episodes can  
77 lead to excessive  $\text{Mn}^{2+}$  absorption and toxicity, affecting plant physiology and  
78 development across different soil types (Sparrow and Uren, 1987).

79 Surface soil acidity can be ameliorated by applying lime ( $\text{CaCO}_3$ ). However,  
80 it is challenging to incorporate lime in deeper layers to correct the subsoil acidity,  
81 and it takes several years before these soils become productive for commercial  
82 cropping. To cope with toxic levels of  $\text{Mn}^{2+}$  ions, plants have evolved several  
83 strategies, such as sequestration into subcellular compartments, activation of  
84 the antioxidant system, and regulation of the uptake, translocation, and  
85 distribution of Mn (Fecht-Christoffers et al., 2006, Peiter et al., 2007, Li et al.,  
86 2019). Several proteins play a role in the homeostasis and detoxification of  $\text{Mn}^{2+}$ .  
87 These include various transporters such as Natural Resistance Associated

88 Macrophage Protein (NRAMP1, NRAMP3, NRAMP4, NRAMP5), Iron  
89 Transporter (IRT1), ATP-binding cassette (ABC, multidrug resistance-  
90 associated proteins, MRP), iron-regulated transporters (IREG) and Cation/H<sup>+</sup>  
91 Exchanger (CAX, CAX2, ECA1), Cation diffusion Facilitator (CDF, or metal  
92 tolerance protein, MTP), and P-type ATPase (ZIP) (Castaings et al., 2021, Li et  
93 al., 2019).

94 Natural variation for tolerance to Mn<sup>2+</sup> toxicity is described in several plant  
95 species, including *Brassica napus* (Foy, 1984, Horiguchi, 1988, Khan and  
96 McNeilly, 1998, Basu et al., 2001, Schaaf et al., 2002, Kassem et al., 2004, Peiter  
97 et al., 2007, Mizuno et al., 2008, Pradeep et al., 2020, Wratten and Scott, 1979,  
98 Moroni et al., 2003, Delhaize et al., 2003, Raman et al., 2017). Studies have  
99 shown that *AtMTP11*, *BnMTP8.C04*, *BnMTP9.A07*, *ShMTP1*, and *NRAMP5*  
100 confer tolerance to Mn<sup>2+</sup> tolerance in plants (Gu et al., 2022, Delhaize et al., 2003,  
101 Delhaize et al., 2007, Noor et al., 2023). However, the genetic basis of natural  
102 variation in tolerance to Mn<sup>2+</sup> toxicity was not described in diverse *B. napus*  
103 germplasm.

104 *B. napus* (canola/rapeseed,  $2n = 4x = 38$ , genome  $A^nA^nC^nC^n$ ) is a widely  
105 grown critical crop of importance to agriculture and is sensitive to Mn<sup>2+</sup> toxicity.  
106 It contributes approximately 12% of the global edible vegetable oil supply (FAO  
107 STAT, <https://www.fao.org/faostat/>) and protein for feedstock. In addition, canola  
108 oil accounts for 80%–85% of the renewable sources for biodiesel production  
109 (Tursi, 2019). To develop Mn<sup>2+</sup> tolerant canola cultivars suitable for cultivation  
110 on acid soils, we have previously mapped a locus, *BnMTP8.A09*, for tolerance  
111 to Mn<sup>2+</sup> toxicity (Raman et al., 2017) near the chromosome A09 orthologues of  
112 the *AtMTP8* transporter gene of *A. thaliana* (Delhaize et al., 2003). QTL mapping  
113 studies often capture only a slice of the genetic architecture of a trait because  
114 only alleles that differ between parental lines segregate (Holland, 2007).  
115 Understanding the genetic architecture of Mn<sup>2+</sup> tolerance genes in genetically  
116 diverse germplasm provides insights into crop adaptation and assists the

117 development of canola varieties.

118 Herein, we present the genetic architecture of Mn<sup>2+</sup> tolerance in canola,  
119 which shows multiple loci contribute to tolerance to Mn<sup>2+</sup> toxicity in diverse  
120 germplasm. In addition, we characterize and demonstrate that *the BnMTP8.A09*  
121 gene is a key candidate that explains a substantial proportion of variation in Mn<sup>2+</sup>  
122 toxicity and is associated with tolerance Mn<sup>2+</sup> toxicity under laboratory,  
123 glasshouse, and field conditions.

124

## 125 **Results**

### 126 **Genotypic variation for Mn<sup>2+</sup> tolerance in 326 *B. napus* accessions**

127 For elucidation of the genetic architecture underlying tolerance to Mn<sup>2+</sup> toxicity,  
128 we carried out six experiments (Method S1). To screen for Mn<sup>2+</sup> tolerance we  
129 first scored symptoms of Mn<sup>2+</sup> toxicity after five days of Mn<sup>2+</sup> treatment in 415  
130 accessions of *B. napus* (Table S1). Mn<sup>2+</sup> toxicity was typically characterized by  
131 extensive chlorosis on the cotyledonary lobes (Figure 1A). Several accessions  
132 showed interveinal and marginal leaf chlorosis with some displaying cupping  
133 and necrotic spots on the leaf, suggestive of Mn<sup>2+</sup> sensitivity. However, there  
134 were Mn<sup>2+</sup> tolerant accessions which revealed no such visible symptoms or  
135 limited chlorosis (Figure 1B-F). We scored each accession for their Mn<sup>2+</sup>  
136 tolerance, visibly on a scale of 1 to 5, While a majority of accessions (74%) were  
137 generally sensitive to Mn<sup>2+</sup> with scores above 3, we observed significant  
138 variation among diverse accessions (Table S2, Figure 1G).

139

### 140 **Genome-wide association analysis (GWAS) reveals genetic architecture** 141 **for Mn<sup>2+</sup> tolerance**

142 To ascertain the genetic relatedness of the accessions, we carried out whole  
143 genome resequencing (WGR) at a moderate depth (4.69× to 99.59× with an  
144 average of 13.03×, Table S3). WGR provided 8,789,769 high-quality single  
145 nucleotide polymorphisms (SNPs) mapped to the reference genome of *B.*

146 *napus* cv. Darmor-bzh v.4.1. Filtering-out variants with minor allele frequencies  
147 (MAF) <0.05 and missing rate >0.9 resulted in a total of 2,226,172 high-quality  
148 SNPs used for GWAS analysis, which averages to roughly one SNP marker per  
149 20Kb of the canola genome. Population structure analysis revealed four  
150 genetically distinct clades: I, II, III, and IV in the GWAS population, consistent  
151 with their geographic origins (Figure 2A-C, Table S4). We calculated pairwise  
152 SNP linkage disequilibrium (LD) using 1,981,597 tagged SNP derived from  
153 haploblocks. The LD patterns were variable across the whole ( $A^nC^n$ ) genome  
154 and within the  $A^n$  and the  $C^n$  subgenomes. Consistent with previous studies  
155 (Chalhoub et al., 2014), the LD decays faster in the  $A^n$  subgenome than in the  
156  $C^n$  subgenome (Figure 2D).

157 Using  $Mn^{2+}$  toxicity phenotypes of the cotyledons and accounting for  
158 population structure and kinship coefficients, we identified 34 significant SNP  
159 associations (binned into three loci) for  $Mn^{2+}$  tolerance on chromosomes A09,  
160 C03, and C09 (Figure 3A, Figure S1B, Table S5). There was a good fit between  
161 observed and expected SNP associations (Figure 3B). Twenty-nine SNP  
162 associations (of 34 SNPs) were identified within the 300 kb genomic region on  
163 A09 (Table S5). Our results indicate that multiple loci contribute to tolerance to  
164  $Mn^{2+}$  toxicity.

165

### 166 **Validation and fine mapping of the GWAS loci using bi-parental** 167 **populations**

168 To verify the linkage between  $Mn^{2+}$  tolerance and SNP markers, we performed  
169 selective sweep analysis using  $F_{ST}$  and ratio test, utilizing a cohort of 50 extreme  
170 accessions (25 tolerant accessions having mean score  $\leq 2$ , group1 and 25  
171 sensitive accessions with a mean score of  $\geq 4$ , group 2) from the GWAS panel  
172 (Table S6). Although current breeding programs are not intentionally selecting  
173 for  $Mn^{2+}$  tolerance, our results showed that the A09 genomic region is subjected  
174 to passive selection under acid soil conditions (Figure S1A). Haplotype

175 association analysis revealed that A09 haplotypes showed a statistically  
176 significant difference in Mn<sup>2+</sup> tolerance (Figure 3C-G).

177 To validate the genetic linkage between Mn<sup>2+</sup> tolerance and A09 genomic  
178 region, we generated two F<sub>2</sub> populations derived from P3083 (China, tolerant to  
179 Mn<sup>2+</sup>) × ZY003 (China, sensitive to Mn<sup>2+</sup>), and Mutu (Japan, tolerant to Mn<sup>2+</sup>) ×  
180 RSO 96 (sensitive to Mn<sup>2+</sup>), and tested them in hydroponic culture. Both  
181 populations showed approximately monogenic segregation for Mn<sup>2+</sup> tolerance  
182 in a dominant manner (Table S7, Figure S2). QTL analysis revealed a single  
183 genomic region for Mn<sup>2+</sup> tolerance on chromosome A09 (Figure S3). We  
184 compared the physical positions of SNPs associated with Mn<sup>2+</sup> tolerance with  
185 those identified in the earlier study from Darmor-*bzh*/Yudal (Raman et al., 2017).  
186 We found that one genomic region on chromosome A09 (26.36 Mb to 27.16Mb)  
187 is shared across the GWAS, F<sub>2</sub>, and DH (Darmor-*bzh*/Yudal) panels (Table S5),  
188 suggesting of common allelic variation at this locus for Mn<sup>2+</sup> tolerance in *B.*  
189 *napus*. To test whether Mutu and Darmor-*bzh*, earlier described sources of Mn<sup>2+</sup>  
190 tolerance (Moroni et al 2003, Raman et al 2017) also harbour the same gene(s),  
191 we made crosses between three sources of tolerance. There was no  
192 segregation among F<sub>2</sub> progenies derived from Darmor-*bzh* (France, tolerant to  
193 Mn<sup>2+</sup>) × Mutu (Japan, tolerant to Mn<sup>2+</sup>) and Darmor-*bzh* (tolerant to Mn<sup>2+</sup>) × Jet  
194 Neuf (France, tolerant to Mn<sup>2+</sup>) TableS7, Figure S2 ). These results suggest that  
195 parental lines Darmor-*bzh*, Jet-Neuf, and Mutu have the same or similar alleles  
196 that control Mn<sup>2+</sup> tolerance. This result also corroborates that Darmor-*bzh* and  
197 Jet-Neuf share a common ancestry.

198

### 199 **Candidate genes underlying significant loci contributing to Mn<sup>2+</sup> tolerance**

200 We searched candidate genes based on LD with significantly associated SNPs  
201 (Table S5) and found 19 genes that were located within the 7.8 kb regions of  
202 the GWAS-SNPs on A09, C03, and C09 chromosomes (Figure S1B-D, Table  
203 S8), including Metal Tolerance Protein 8 (MTP8, designated as *BnMTP8* in *B.*

204 *napus*), which has previously been shown to confer natural variation in Mn<sup>2+</sup>  
205 tolerance in Arabidopsis (Delhaize et al., 2003) making it an obvious candidate  
206 for further investigation. Protein-protein-interaction network using the STRING  
207 (search tool for recurring instances of neighbouring genes) database (Version  
208 11.0, <http://string-db.org/>) also revealed that candidate genes prioritized in this  
209 study are related to cation transport and intercellular homeostasis. Candidate  
210 genes include several Zn transporters (*ZAT*, *AT2G04620*, *AT3G12100*, *MTPB1*,  
211 *AT1G51610*, *MTPA2*), high-affinity Mn<sup>2+</sup> transporter involved in Mn, Fe, Cd and  
212 Co acquisition (*NRAMP1*), vacuolar transporter involved in intercellular metal  
213 (Fe, Mn, Cd and Co) homeostasis, *IREG2*, (*IRON REGULATED 2*) encoding  
214 *FPN2*, a tonoplast localized Ni transport protein network with *MTP8*, and *TMN1*  
215 (*Transmembrane 9*) gene which interacts with proteins involved in Golgi  
216 transport complex-related vascular transport, inter-cellular protein transport,  
217 and transfer from ER via Golgi (Figure S1E-G).

218 We sequenced the full length of *BnMTP8* alleles (1966 bp) from the parental  
219 lines of the Darmor-*bzh*/Yudal DH population using A09 sequence-specific  
220 primers, which revealed 12 polymorphic SNPs and InDELS (Table S9, Figure  
221 4A). In addition, we characterised sequence variants in *BnMTP8* from a dataset  
222 of 2,289 *B. napus* sequenced accessions (<http://yanglab.hzau.edu.cn/BnIR>).  
223 These data revealed that the *BnMTP8.A09* downstream sequence had the most  
224 sequence variants (55.6%) consistent with its association suggestive of that  
225 being the candidate gene (Figure 4B-C).

226

### 227 **Gene expression variation in *BnMTP8.A09* explains 74% of natural** 228 **variation in Mn<sup>2+</sup> tolerance**

229 To assess whether *BnMTP8.A09* is the major locus associated with Mn<sup>2+</sup>  
230 tolerance in *B. napus*, we performed a selective DNA genotyping of 20 DH lines  
231 of Darmor-*bzh*/Yudal segregating for Mn<sup>2+</sup> tolerance by Sanger sequencing. We  
232 found a complete linkage between *BnMTP8.A09* alleles and Mn<sup>2+</sup> tolerance



233 (Figure S4A). To assess whether the expression level of the *BnMTP8* gene  
234 correlates with phenotypic difference in Mn<sup>2+</sup> toxicity, we compared the  
235 expression levels of *BnMTP8.A09* in extreme accessions which were  
236 categorised as sensitive (S) or tolerant (T) to Mn<sup>2+</sup> toxicity (Table S10). There  
237 are six copies of the *BnMTP8*, located on the homoeologous regions on the *A*<sup>n</sup>  
238 and *C*<sup>n</sup> subgenomes (A04/C04, A07/C06 and A09/C08) differ only by a few  
239 SNPs (Figure S4B, Table S9). We designed multiple primers with a 3' mismatch  
240 to specifically amplify and quantify the *MTP8* sequence on chromosome A09  
241 (gene ID: BnaA09g37250D in Darmor-*bzh* v4.1 reference, Table S11). The  
242 amplified products were sequence verified to ensure that PCR amplification is  
243 specific to only *BnMTP8.A09*. Our analysis revealed a striking correlation  
244 between sensitive and tolerant lines, with the expression levels being visibly  
245 high in tolerant lines compared to sensitive ones (Figure 5A, Figure S5).  
246 Quantitative reverse-transcription PCR analysis revealed that expression levels  
247 of *BnMTP8.A09* could explain up to 74% variance in the Mn<sup>2+</sup> tolerance  
248 phenotype ( $R^2=0.74$ , Nominal Logistic regression with expression level as a  
249 factor and phenotype (sensitive/tolerant) as a response,  $p < 0.0001$ ). In addition,  
250 among the tolerant varieties, there was a marginal yet significant increase in  
251 *BnMTP8.A09* expression upon Mn<sup>2+</sup> treatment (Fig. 5B). Based on this striking  
252 correlation, we conclude that Mn<sup>2+</sup> dependent transcriptional control of  
253 *BnMTP8.A09* expression levels accounts for most of the variation in Mn<sup>2+</sup>  
254 toxicity in *B. napus* accessions.

255 We further raised the same 20 diverse accessions differing in *BnMTP8.A09*  
256 expression (Figure 5C) with and without Mn<sup>2+</sup> treatments in controlled  
257 environment conditions (22°C, 50% humidity, 16/8 h). As expected, tolerant  
258 lines showing high *BnMTP8.A09* expression lines did not show critical  
259 symptoms of Mn<sup>2+</sup> toxicity and accumulated 5.04× higher biomass than Mn<sup>2+</sup>  
260 sensitive and low *BnMTP8.A09* expression lines. Low *BnMTP8.A09* expression  
261 lines carrying sensitive alleles for Mn<sup>2+</sup> tolerance showed reduced SPAD values,

262 a proxy for chlorophyll content of the expanded leaf, and shoot biomass in high  
263  $Mn^{2+}$  concentration (125 $\mu$ m  $MnCl_2$ ) compared to tolerant lines with high  
264 *BnMTP8.A09* expression (Figure 5C-D).  $Mn^{2+}$  tolerance positively correlated  
265 with fresh and dry shoot weights (Figure 5E-F). The chlorophyll (SPAD values)  
266 had a negative relationship with  $Mn^{2+}$  tolerance (Figure 5E). Chlorophyll is  
267 essential for net photosynthesis assimilation, which could affect biomass  
268 production. In previous studies, high biomass was positively related to seed  
269 yield in *B. napus* (Raman et al., 2016, Raman et al., 2020).

270 To directly assess whether these lines differ in  $Mn^{2+}$  accumulation, we  
271 performed inductively coupled plasma mass spectrometry (ICP-MS) analysis,  
272 which revealed that *B. napus* lines sensitive to  $Mn^{2+}$  toxicity accumulated more  
273 manganese than  $Mn^{2+}$  tolerant lines; shoot Mn content and  $Mn^{2+}$  tolerance score  
274 were positively correlated ( $r = 0.75$ , Figure 5F). Furthermore, Mn concentration  
275 negatively correlated ( $r = 0.5$ ) with Fe and positively correlated with Ca ( $r = 0.8$ )  
276 accumulation (Figure S6), suggesting that  $Mn^{2+}$  toxicity could be related to Fe  
277 deficiency in the acidic soils.

278

### 279 ***BnMTP8.A09* is a bonafide $Mn^{2+}$ transporter**

280 To confirm the contribution of the *BnMTP8.A09* gene in natural variation in  $Mn^{2+}$   
281 tolerance, we performed a complementation assay using the Mn-hypersensitive  
282 yeast strain *pmr1* $\Delta$ . *Pmr1* is a P-type ATPase responsible for transporting Ca  
283 and Mn into the Golgi apparatus, a major pathway for the cellular detoxification  
284 of manganese (Antebi and Fink, 1992). Yeast assays revealed that the  
285 *BnMTP8.A09* gene imparts the  $Mn^{2+}$  tolerance in the yeast strain *pmr1* $\Delta$ , which  
286 tolerated elevated Mn levels (50mM, i.e., 400 $\times$  dose), which enabled  
287 discrimination of  $Mn^{2+}$  tolerant lines from sensitive ones in nutrient solution  
288 (Figure 6). These findings suggest that *BnMTP8.A09* is a bonafide  $Mn^{2+}$   
289 transporter.

290

291 **Expression QTL analysis revealed the central role of *BnMTP8.A09* in the**  
292 **genetic architecture of Mn<sup>2+</sup> tolerance.**

293 To investigate what regulates the expression of *BnMTP8.A09*, which  
294 explained close to 74% of the variation in Mn<sup>2+</sup> tolerance, we carried out the  
295 expression quantitative trait loci (eQTL) mapping of *BnMTP8.A09* in the *B.*  
296 *napus* population using RNA sequencing data from seedling leaves of 154 *B.*  
297 *napus* accessions (Figure S7A). Four eQTL of *BnMTP8.A09* were detected on  
298 chromosomes A09, C03, C04 and C08 (Figure 7A) and three of them  
299 colocalized with Mn<sup>2+</sup> tolerance-related loci (Figure 3A, 7A). Based on the  
300 physical distance between eQTL and the target gene, we found the eQTL on  
301 A09 is *cis*-eQTL (< 1Mb) of *BnMTP8.A09*. *BnMTP8.A09* showed a higher  
302 expression among different homologues (Figure S7B) and is *cis*-regulated by  
303 SNPs of its flanking sequence. These findings strongly support our thesis that  
304 *BnMTP8.A09* is the target causal gene in the QTL of Mn<sup>2+</sup> tolerance.  
305 Interestingly, we found three *trans*-eQTL of the *BnMTP8* homologues and two  
306 of them were on C04 and C08 (Figure 7B); although, there was no significant  
307 GWAS SNP within the two gene loci probably due to their expression dosage  
308 compensation effect on *BnMTP8.A09*. These results indicated that  
309 *BnMTP8.A09* has the most important effect among *MTP8* homologs. For the  
310 colocalized eQTL and QTL on C03, we found a candidate gene, Fe homeostasis-  
311 related FERRIC REDUCTASE DEFECTIVE3 (*BnaC03g49020D*,  
312 *BnFRD3.C03/BnMATE.C03*), a member of the MATE gene family that is also  
313 involved in cross-talk with Zn tolerance (Rogers and Guerinot, 2002, Pineau et  
314 al., 2012), contribute to Mn<sup>2+</sup> tolerance and also could have genetic interaction  
315 with *MTP8* involved in Mn<sup>2+</sup> tolerance network. The QTL of Mn<sup>2+</sup> tolerance on  
316 A09 also showed epistatic effects with the QTL on C03 and C09 (Table S12).  
317 Nevertheless, these results indicated that *BnMTP8.A09* plays a central role in  
318 Mn<sup>2+</sup> tolerance in *B. napus*. Next, we asked which of the specific  
319 polymorphism(s) could explain most of the variation in *BnMTP8.A09* of *B. napus*

320 2,280 accessions. We found that only an InDel(Ref/Alt = AT/A), in nine Asian  
321 and European accessions (Figure 7C, D), showed a significant association with  
322 *BnMTP8.A09* (BnaA09g37250D) expression in 289 *B. napus* accessions (Figure  
323 7D). Interestingly, the same InDel was previously found to be associated with  
324 seed oil content (Figure S7E), suggestive of pleiotropy (Yang, 2023)

325

326 ***BnMTP8.A09* alleles confer tolerance to Mn<sup>2+</sup> toxicity under field**  
327 **conditions and are under purifying selection.**

328 To assess whether allelic variation in *BnMTP8.A09* indeed makes a difference  
329 to plants, we tested 175 doubled haploid (DH) lines from the Darmor-*bzh*/Yudal  
330 (DY) population with natural alleles that segregate for Mn<sup>2+</sup> tolerance, along with  
331 parental lines of DY population and 15 controls in acid soil conditions at  
332 Mangoplah, NSW, Australia (2022, soil pH: 4.5, Mn = 198µM, Figure S8A). We  
333 observed critical symptoms for Mn<sup>2+</sup> toxicity, manifested as leaf chlorosis, were  
334 visible at physiological maturity (BBCH GS89) when plots were waterlogged due  
335 to excessive rainfall and subjected to high temperatures (Figure S8B), though  
336 conditions (warm and dry winter and early spring) at earlier stages were not  
337 favourable to assess Mn<sup>2+</sup> toxicity in the cotyledon stage. However, symptoms  
338 of Mn<sup>2+</sup> toxicity were apparent in reshoots and plants regenerated from pre-  
339 harvest shattered seeds in the plots (Figure 8). We took an opportunistic  
340 approach, scored symptoms of Mn<sup>2+</sup> toxicity (leaf chlorosis) on re-shooted  
341 plants, and related them with Mn<sup>2+</sup> tolerance scores from the nutrient screening  
342 experiment. Interestingly, cotyledon chlorosis scores of DH lines assessed in  
343 nutrient culture (Raman et al., 2017) were positively correlated with leaf  
344 chlorosis in the field ( $r = 0.45$ , Figure S6A). To verify the results, we selected 20  
345 lines from the DYDH population that had consistent scores for Mn<sup>2+</sup> tolerance in  
346 nutrient solution and field conditions and had contrasting marker alleles  
347 associated with Mn<sup>2+</sup> tolerance at *BnMn<sup>2+</sup>.A09* locus (Raman et al., 2017). These  
348 lines were evaluated in acidic soil having high Mn<sup>2+</sup> (pH 4.5), collected from

349 Mangoplah under glasshouse conditions at Wagga Wagga. Test lines showed  
350 differences in tolerance to  $Mn^{2+}$  toxicity and a positive correlation ( $r = 0.9$ ) with  
351 cotyledon scores in nutrient culture. These findings conclusively demonstrated  
352 that *BnMTP8.A09* indeed confers tolerance to  $Mn^{2+}$  toxicity not only in lab  
353 conditions but also in field conditions.

354 To assess whether *BnMTP8.A09* alleles may have undergone selection  
355 during crop domestication, we determined nonsynonymous sites  
356 ( $Ka$ )/synonymous sites ( $Ks$ ) of *BnMTP8.A09*. Our results suggested that  
357 *BnMTP8.A09* is under purifying selection ( $p=0$ ) irrespective of *B. napus*  
358 ecotypes (Figure S9). These findings suggest conservation of gene function  
359 across spring, winter and semi-winter types due to adaptation to environments  
360 with  $Mn^{2+}$  toxicity.

361

## 362 **Discussion**

### 363 **Natural variation in $Mn^{2+}$ tolerance in *B. napus***

364 *B. napus* was domesticated and selected for consumer preferences in Southern  
365 Europe, where carbonate-rich soils are highly prevalent (Gómez-Campo and  
366 Prakash, 1999, Prakash et al., 2011). In this study, we assessed a diversity panel  
367 representing spring, semi-winter and winter ecotypes and identified only five  
368 (1.2%)  $Mn^{2+}$  tolerant *B. napus* accessions (which had the least chlorosis scores  
369 of  $\leq 1$ ) of spring-type from Asia (Pakistan, Japan), and winter-type from Europe  
370 (France, Germany, Table S1-2). These results suggest that populations of *B.*  
371 *napus* had progressed adaptation mechanisms to minimize the harmful effects  
372 of toxic ions in acid soils by natural selection and/or by passive selection by  
373 breeders.

374

### 375 ***BnMTP8.A09* controls natural variation for $Mn^{2+}$ tolerance in *B. napus***

376 Through GWAS, selective sweep and eQTL analyses, we uncovered 3 to 4  
377 genomic regions for  $Mn^{2+}$  tolerance (Figures 3, 7, S1), suggesting that genome-

378 wide approaches are suitable for revealing the architecture of Mn<sup>2+</sup> tolerance.  
379 One of the highly significant association peaks was located close to the  
380 *BnMn<sup>2+</sup>.A09* locus, previously identified by QTL analysis in the *B. napus* DH  
381 population (Raman et al., 2017). However, no QTL/eQTL for Mn<sup>2+</sup> tolerance on  
382 C03 and C09 chromosomes were identified in earlier studies. The *trans*-eQTL  
383 associated with Mn<sup>2+</sup> tolerance on chromosomes A09 and C03 (Figure 7) were  
384 mapped within the LD of GWAS-SNPs, suggesting that both genes  
385 (*BnMTP8.A09* and *BnMATE.C03*) are likely coregulated. Future studies need to  
386 validate those new genomic regions for their contribution to Mn<sup>2+</sup> tolerance.

387 We identified several highly significant SNP associations that were located  
388 near the transporter genes (Table S8). These transporters are implicated in  
389 metal ion transport in different plant species (Leung et al., 2019, De Caroli et al.,  
390 2020, Chu et al., 2017, Tsunemitsu et al., 2018). For example, MTP8 is a  
391 tonoplast localized member of the CDF and functions in roots as an Mn<sup>2+</sup>  
392 transporter. In Arabidopsis, it transports Mn into root vacuoles of iron-deficient  
393 plants, thereby inhibiting iron deficiency-induced (ferric) chlorosis (Eroglu et al.,  
394 2016). MATE transporters are implicated in turgor-regulating chloride channels  
395 and xenobiotic detoxification by transmembrane export across the plasma  
396 membrane; this gene confers Al<sup>3+</sup> tolerance by mediating citrate efflux from root  
397 cells in wheat, barley, sorghum and Arabidopsis (Upadhyay et al., 2019, Zhang  
398 et al., 2017) to chelate Al<sup>3+</sup>. The ABCC5 (C09) encodes a High-Affinity Inositol  
399 Hexakisphosphate Transporter. It plays a role in the signalling of guard cells,  
400 phytate storage, cellular potassium ion homeostasis, and response to salt stress  
401 (Lemtiri-Chlieh et al., 2000, Andolfo et al., 2015). ABC transporters are  
402 responsible for detoxifying many compounds from the cytoplasm (Klein et al.,  
403 2006).

404

#### 405 ***BnMTP8.A09* imparts Mn<sup>2+</sup> tolerance in canola and yeast**

406 In this study, we show for the first time the functionality of *BnMTP8.A09* that

407 underlies natural variation in Mn<sup>2+</sup> tolerance in *B. napus* yeast complementation  
408 assay in a strain lacking the Golgi-mediated cytoplasmic efflux carrier PMR1  
409 (Dürr et al., 1998), and phenotypic expression using natural alleles under  
410 controlled environment and field conditions. *MTP8* homologs have been shown  
411 to enhance tolerance to Mn<sup>2+</sup> toxicity, Mn sequestration and plant growth in  
412 different species (Mills et al., 2008, Eroglu et al., 2016, Delhaize et al., 2003,  
413 Chen et al., 2013). For example, *AtMTP8* is reported to alleviate the antagonistic  
414 interference of Mn<sup>2+</sup> with Fe<sup>2+</sup> by loading Mn<sup>2+</sup> into the root vacuole at high pH  
415 conditions in Arabidopsis (Eroglu et al., 2016, Farthing et al., 2023). In *B. napus*,  
416 three homologues; *BnMTP3*, *BnMTP8* (BnaCnng31720D on chromosome  
417 C04/*BnMTP8.C04*, AT3G58060D) and *BnMTP9.A07* (BnaA07g34970D,  
418 AT1G79520D) are shown to load Mn<sup>2+</sup> into vesicles for subsequent delivery to  
419 the vacuole or secretion into extracellular spaces and maintain Mn<sup>2+</sup>  
420 homeostasis in the roots and shoots (Gu et al., 2022, Gu et al., 2021). In this  
421 study, ICP-MS analysis also suggested that Mn<sup>2+</sup> tolerant accessions do not  
422 accumulate higher Mn in the shoots than Mn<sup>2+</sup> sensitive lines (Figure 7D);  
423 therefore, tolerant accession could compartmentalize and sequester Mn<sup>2+</sup> into  
424 the vacuole.

425

#### 426 **Validation of high throughput method for screening germplasm for Mn<sup>2+</sup>** 427 **tolerance**

428 Evaluating natural or transgenic *B. napus* lines under field conditions is  
429 challenging, as the phenotypic expression of Mn<sup>2+</sup> toxicity depends on soil pH  
430 and weather conditions. Our results are consistent with literature that suggests  
431 warm and waterlogged conditions favour the expression of Mn<sup>2+</sup> toxicity genes  
432 in acidic soil containing high exchangeable Mn<sup>2+</sup>. In addition, the critical  
433 symptoms of tolerance for Mn<sup>2+</sup> toxicity and symptoms were variable across the  
434 field plots. It is emphasized that Mn<sup>2+</sup> toxicity is not only a limitation in the acidic  
435 soil; the availability and/or unavailability of other ions, such as Al<sup>3+</sup>, H<sup>+</sup>, Fe<sup>2+</sup>, and  
436 Ca<sup>2+</sup>, could compromise the expression of Mn<sup>2+</sup> tolerance under field conditions.

437 We rated the plots that showed no symptoms of Mn<sup>2+</sup> toxicity as tolerant, while  
438 plots showing >10% of plants were scored as Mn<sup>2+</sup> sensitive. Therefore, this  
439 criterion was subjected to ascertainment bias. Our data showed that  
440 hydroponic-based screening is more robust and reliable than field and  
441 glasshouse screening of large breeding germplasm that requires a large volume  
442 of soil with desired characteristics. Many plants can be screened in less than 10  
443 days in a hydroponic system, providing highly reliable phenotyping for Mn<sup>2+</sup>  
444 tolerance. High throughput phenotyping, in conjunction with molecular markers,  
445 could provide an efficient pipeline for tracking Mn<sup>2+</sup> tolerance alleles in the *B.*  
446 *napus* breeding program. The resources developed herein would enhance  
447 selection efficiency in the breeding programs.

448

## 449 **Conclusion**

450 Multiple lines of evidence support the conclusion that *BnMTP8.A09*, in  
451 conjunction with *BnMATE.C03*, *BnMTP8.C04* and *BnMTP8.C08*, play a  
452 significant role in conferring Mn<sup>2+</sup> tolerance in *B. napus*. This includes GWAS,  
453 eQTL, QTL, gene expression profiling, yeast complementation, doubled  
454 haploids, Mn uptake analyses, with a range of phenotypic assays performed in  
455 laboratories, controlled environments, and field trials. Collectively, all of these  
456 indicate that expression of *BnMTP8.A09* is a major effect QTL for Mn tolerance  
457 in *B. napus*, such that gene expression variation in *BnMTP8.A09* explains 74%  
458 of natural variation in Mn<sup>2+</sup> tolerance.

459

## 460 **Materials and Methods**

### 461 **Plant materials**

462 To investigate the genetic architecture of loci controlling tolerance to Mn<sup>2+</sup>  
463 toxicity, we carried out six experiments in laboratory, glasshouse and field  
464 conditions (Method S1). The GWAS panel consisted of 415 *B. napus* spring,  
465 semi-winter and winter accessions representing Australian, Asian, North  
466 American and European breeding programs (Experiment 1).

467 To test the genetic inheritance, chromosomal locations and relevance of



468 GWAS associations in the *B. napus* breeding programs, we generated three F<sub>2</sub>  
469 intercross populations derived from P3083 (Chinese cultivar) × ZY003 (Chinese  
470 cultivar), Darmor-*bzh* (French cultivar) × Mutu (Japanese cultivar), and Darmor-  
471 *bzh* × Jet Neuf (French cultivar) (Experiment 2-3; Table 1). The relationship  
472 between Mn<sup>2+</sup> tolerance and *BnMTP8* expression was established using a  
473 subset of GWAS (Experiment 4). For field validation of Mn<sup>2+</sup> tolerance under  
474 field conditions, 175 doubled haploid (DH) population and its parental lines:  
475 Darmor-*bzh* and Yudal (Korean cultivar) population (Pilet et al., 1998, Raman et  
476 al., 2017) plus 15 controls (Table S1), complemented with a glasshouse  
477 bioassay (Experiment 5).

478

#### 479 **Phenotypic evaluation for tolerance to Mn<sup>2+</sup> toxicity**

480 Genetic variation of *B. napus* accessions for tolerance to Mn<sup>2+</sup> toxicity was  
481 assessed in different environments (Table S1). Response of *B. napus* GWAS  
482 and F<sub>2</sub> lines to Mn<sup>2+</sup> tolerance was assessed initially in a nutrient solution  
483 supplemented with 125µM of manganese tetrahydrate (MnCl<sub>2</sub>·4H<sub>2</sub>O) as  
484 described previously (Raman et al., 2017). Statistical valid experiment designs  
485 were followed and detailed (Methods S2). After 96 h of Mn<sup>2+</sup> treatment, the  
486 critical symptoms of Mn<sup>2+</sup> toxicity as the extent of chlorosis on cotyledonary  
487 lobes were scored quantitatively as "1" to "5" as described earlier (Raman et  
488 al., 2017). After scoring each F<sub>2</sub> population and the parental lines for Mn<sup>2+</sup>  
489 tolerance, 2 to 3-week-old seedlings from each population were transplanted in  
490 plastic pots to raise F<sub>2:3</sub> progenies. Plants were selfed to ensure purity and avoid  
491 cross-pollination for different phenotyping and genotyping experiments. Each  
492 F<sub>2:3</sub> line was assessed for Mn<sup>2+</sup> tolerance as described above.

493

#### 494 **Evaluation of lines for field and glasshouse performance**

495 A total of 192 lines, including 175 from DH population derived from Darmor-*bzh*  
496 and Yudal, two parental lines (Darmor-*bzh* and Yudal) and 15 controls were

497 evaluated to test their performance on acid soil at Mangoplah, NSW, Australia  
498 (35.3532054°S, 147.2901734°E, *Experiment 5*). Symptoms of Mn<sup>2+</sup> toxicity were  
499 visually scored as tolerant (0) and sensitive (1). Lines segregation for Mn<sup>2+</sup>  
500 tolerance (in control accessions) were scored as intermediate (0.5). Experiment  
501 6 involved the evaluation of 20 DH lines from the Darmor-*bzh*/Yudal population  
502 with different *BnMTP8* alleles for tolerance and sensitivity to Mn<sup>2+</sup> toxicity. Acid  
503 soil was collected from the top 30 cm layers from the Mangoplah site and tested  
504 for pH. The soil had a pH of 4.3 in CaCl<sub>2</sub>, and Mn content was 198µM. The soil  
505 suitability was validated using a bioassay conducted in an environment-  
506 controlled growth chamber (Percival, USA) with a 250 µmol M<sup>-2</sup> S<sup>1</sup> photon flux  
507 density, 50% humidity and a 22°C/20°C (16/8h) day/night temperature regime.

508

#### 509 **DNA isolation**

510 Genomic DNA was isolated following a standard phenol/chloroform extraction  
511 method for whole-genome resequencing and targeted gene sequencing of the  
512 *BnMTP8.A09* gene using the Sanger-sequencing approach at the Australian  
513 Genomic Research Facility (<http://www.agrf.com>). Low-density DArTseq  
514 genotyping of F<sub>2</sub> lines based on the genotyping-by-sequencing method (Raman  
515 et al., 2014).

516

#### 517 **Whole Genome Resequencing and SNP Identification**

518 We resequenced 326 accessions using the WGR approach at the commercial  
519 Novogene and Illumina HiSeqXTen services (BGI-Shenzhen, China). Clean  
520 paired-end reads were mapped to the *B. napus* reference genome sequence,  
521 version 4.1 of the Darmor-*bzh*, downloaded from the Genoscope website  
522 (<https://www.genoscope.cns.fr/brassicanapus>, Chalhoub *et al.*, 2014) using  
523 BWA-MEM with default parameters (Li and Durbin, 2009). The SNPs for each  
524 line were identified using the pipeline of Sentieon DNaseq (v201711.05,  
525 <https://www.sentieon.com>). The filtering was accomplished with function,

526 variant filtration in GATK (v3.4-46-gbc02625,  
527 <https://soCDFware.broadinstitute.org/gatk/>) using the parameters of QUAL<30,  
528 MQ<50 and QD<2. The extent of heterozygosity and the minor allele frequency  
529 (MAF) were calculated using VCFtools (v0.1.13). High-quality SNPs with MAF  
530 <0.05 and missing rate >0.9 were used for GWAS analysis.

531

### 532 **Population Structure, GWAS and candidate gene identification**

533 The tagSNPs, extracted using plink (v1.9) (Purcell et al., 2007), were used as  
534 input files for phylip software (v3.697)  
535 (<https://evolution.genetics.washington.edu/phylip.html>) to construct the  
536 phylogenetic tree. The tree was visualized using the FigTree package (v1.4.4,  
537 <http://tree.bio.ed.ac.uk/soCDFware/figtree/>). The population structure was  
538 constructed using admixture software (v1.3.0,  
539 [www.genetics.ucla.edu/software/admixture](http://www.genetics.ucla.edu/software/admixture)). We estimated LD in VCFtools,  
540 using high-quality SNPs. The LD between marker pairs was estimated using the  
541 correlation coefficient of the allelic frequencies ( $r^2$ ), considering all the possible  
542 allele combinations. The physical distance when the decay of linkage  
543 disequilibrium (LD) reached the half maximum (1/2 LD distance) was calculated  
544 using VCFtools (v0.1.13, <http://vcftools.github.io>) in a GWAS population. We  
545 accounted for the population structure and the kinship matrix for GWAS. The  
546 latter was calculated using the Efficient Mixed-Model Association eXpedited  
547 (EMMAX)-kin method. GWAS was conducted using the EMMAX software with  
548 a linear mixed model (Kang et al., 2010), which corrects spurious associations  
549 due to population structure. The LD heatmap, Manhattan and Quantile-Quantile  
550 (Q-Q) plots were drawn in the R program (v4.0.5, <https://www.r-project.org/>).  
551 The candidate genes for GWAS loci were extracted based on physical positions  
552 of highly significant associated SNP  $\pm$  1/2 LD distance (kb).

553

### 554 **Selective sweep analyses**

555 The SNP data sets with missing rates  $< 0.1$  were used for selective sweep  
556 analysis. The fixation index ( $F_{ST}$ ) and the nucleotide diversity ( $\pi$ ) were analyzed  
557 using the VCFtools package. We analyzed a cohort of 50 extreme accessions  
558 (25 tolerant accessions with a mean score of  $< 0.2$  and 25 sensitive accessions  
559 with a mean score of  $\geq 4$ ). The t-test of significance was used to determine the  
560 differences between tolerant and sensitive cohorts. The threshold of  $F_{ST} > 0.19$ ,  
561 which corresponded to the top 5% of sites, was used to identify the selective  
562 sweep.

563

#### 564 ***BnMTP8.A09* allele mining in *B. napus* global germplasm**

565 Allelic variation, as SNPs and InDELS, in the *BnMTP8.A09* gene was  
566 investigated in the published dataset of resequenced 2,311 *B. napus* accessions,  
567 representing 1,259 accessions from Asia, 929 accessions from Europe, 60 from  
568 North America, two from South America, 38 from Oceania and four from Africa.  
569 (Song et al., 2020, Tang et al., 2021, Wu et al., 2019, Lu et al., 2019). These  
570 accessions included three ecotypes, spring (354 accessions), winter (756  
571 accessions) and semi-winter (1,122 accessions). All the data were obtained  
572 from BnIR (<https://bnaomics.ocri-genomics.net/>).

573

#### 574 **Genetic architecture of $Mn^{2+}$ tolerance**

575 To describe the genetic architecture underlying  $Mn^{2+}$  tolerance, the reported  
576 QTL region related to the  $Mn^{2+}$  tolerance of *B. napus* was integrated with  
577 significant SNP associations identified in the GWAS panel. Their physical  
578 positions or QTL intervals were aligned to the Darmor-*bzh* reference genome  
579 sequence of *B. napus* and were drawn using the MapChart program.

580

#### 581 ***BnMTP8.A09* gene expression and structural variation analyses**

582 We investigated gene expression using tails, i.e., extreme 20 phenotypes (i.e.,  
583  $Mn^{2+}$  tolerant with 1-2 score and  $Mn^{2+}$  sensitive with 4-5 scores) of the DH

584 population derived from the Darmor-*bzh*/Yudal and GWAS panel (Table 1).  
585 Twelve biological replicates (4 plants/replicate x 3 replications) from each  
586 treatment were taken within one hour during the light cycle at ten days in  
587 hydroponic. Cotyledonary leaves showing tolerant and sensitive phenotypes  
588 were pooled from four plants per replicate and flash-frozen in liquid nitrogen.  
589 cDNA synthesis and the relative expression of the *BnMTP8.A09* gene were  
590 calculated by the relative quantification method, as outlined previously (Raman  
591 et al., 2019). Gene-specific primers for the *BnMTP8.A09* used for the  
592 expression analysis are given in Table S3. We also obtained sequence  
593 information for *MTP8* paralogs from whole-genome resequencing data of the  
594 326 canola accessions. Variation across the *MTP8* paralogs was extracted  
595 using the gene model information or manually identifying gene regions based  
596 on BLAT homology (Table S4). The physical positions of  
597 different *MTP8* paralogs (NCBI GenBank accession; [AT3G58060.1](#), MTP8  
598 cation efflux family protein) were confirmed with those of the  
599 sequenced *MTP8* genes on the ‘Darmor-*bzh*’ assembly v4.1. For each  
600 accession, the *BnMTP8* nucleotide sequences were aligned using MUSCLE as  
601 implemented in the software package Geneious (<https://www.geneious.com>).  
602 Structural variation, the number of polymorphic sites within the gene and the  
603 promoter region were identified. The selection pressure ( $K_a/K_s$  values for  
604 paralogous genes in *Arabidopsis*) of target genes was calculated using  
605 KaKs\_Calculator v3.0 software (Zhang, 2022). The functional domains were  
606 verified using information from the NCBI conserved domain database.

607

### 608 **eQTL mapping on *BnMTP8.A09***

609 To analyse the expression regulation and potential interaction of *BnMTP8.A09*,  
610 we collected the RNAseq data and genotyping data of *B. napus* population from  
611 the Databases, including BnIR (<http://yanglab.hzau.edu.cn/BnIR>) and National  
612 Genomics Data Center (GSA Bioprojects: PRJCA002835, PRJCA002836 and

613 PRJCA013095). The gene expression level was determined by TPM  
614 (Transcripts Per Million) and then used for eQTL mapping on target genes. The  
615 normalized gene expression values were used as the phenotype for eQTL  
616 analysis. GWAS-SNPs with MAF > 0.01 were utilized to perform eQTL mapping  
617 using Genome-wide Efficient Mixed Model Association (Zhou and Stephens,  
618 2012) to detect associations of SNP-gene pairs. The threshold value for  
619 determining significant associations was set as  $-\log_{10}(1/n)$ , where 'n' represents  
620 the total number of SNPs in the *B. napus* population. Based on the distance  
621 between eQTL and target genes, we subdivided an eQTL into *cis*-eQTL if its  
622 lead eSNP was found within 1 Mb from the transcription start site or  
623 transcription end site of the target gene; otherwise, including located on  
624 different chromosomes, it was assumed as *trans*-eQTL.

625

#### 626 **Functional complementation in yeast**

627 We used the hypersensitive yeast strain *pmr* $\Delta$  for functional complementation  
628 assay (Experiment 6). The coding sequence of the *BnMTP8.A09* gene  
629 (*BnaA09g37250D*) was translated to a peptide sequence and then  
630 backtranslated using the EMBOSS backtranslate tool with *Saccharomyces*  
631 *cerevisiae* codon preferences. A gene cassette was designed *in-silico* by  
632 incorporating the *S. cerevisiae* Tef2 promoter (700bp) and *S. cerevisiae* *TDH1*  
633 terminator (224bp) flanking the *S. cerevisiae* codon-optimized coding sequence.  
634 The construct was synthesized (Azena) with a *NotI* site 5' of the promoter  
635 sequence and *BamHI* site 3' of the terminator sequence and was cloned into a  
636 polylinker of the low-copy yeast expression vector PRS-413 (Euroscarf). The  
637 plasmid was transformed into yeast knockout collection strain BY4741  $\Delta$ *PMR1*  
638 by incubating exponential phase cells at 42°C in 360 $\mu$ l of 50% PEG 3500,  
639 100mM Lithium Acetate, containing 10 $\mu$ l herring sperm (Sigma). Transformed  
640 cells were plated on *Saccharomyces cerevisiae* medium with histidine dropout  
641 (Sigma). Vector-only controls were transformed into BY4741  $\Delta$ *PMR1* and

642 By4741. Cells were normalized to an optical density of 1, and a serial dilution  
643 was plated on yeast minimal media without histidine and with various  
644 concentrations of MnCl<sub>2</sub>. Spot assays were photographed after 48 hours.

645

646

#### 647 **Acknowledgements**

648 The authors thank Mr. Kevin McCrea for making the Mangoplah field available  
649 for germplasm evaluation, Ms. Helen Burn for organizing the field site; Nawar  
650 Shamaya and Hannah Roe for help in phenotyping; Warren Bartlett for a sowing  
651 field trial and Novogene Corporation Inc., China, for resequencing accessions.

652

#### 653 **Authors contribution**

654 HR conceived the project, experiments, and research plan and wrote the  
655 manuscript with contributions from SB, HG and BP. RD provided the DH  
656 population from Darmor-*bzh*/Yudal. HR, BM, HG RR, SM, NK and SB conducted  
657 research, and HR, ZB, RR, YZ, NK and SL analyzed the data. All authors read  
658 and approved the final version.

659

#### 660 **Conflict of interest**

661 The authors declare no conflict of interest.

662

#### 663 **Data availability**

664 The data supporting the findings and supplementary data are available within  
665 the paper. Resequencing data is being submitted to NCBI.

666

#### 667 **Legends of Figures**

668 **Figure 1. Critical symptoms and natural variation in tolerance to**  
669 **manganese (Mn<sup>2+</sup>) toxicity in *B. napus* accessions as evident in cotyledon**  
670 **and fully expanded leaves. (A) Mn<sup>2+</sup>-sensitive accessions show extensive**

671 chlorosis on cotyledons of young seedlings grown on 125  $\mu\text{M}$   $\text{MnCl}_2 \cdot 4\text{H}_2\text{O}$  on  
672 day 4 from germination, while  $\text{Mn}^{2+}$  tolerant accessions did not show such  
673 symptoms, as observed in  $\text{Mn}^{2+}$  sensitive accessions. (B)  $\text{Mn}^{2+}$  sensitive  
674 accessions show extensive chlorosis, curling and necrosis on mature leaves of  
675 seedlings (21 days after germination), while  $\text{Mn}^{2+}$  tolerant accessions show no  
676 such symptoms observed in  $\text{Mn}^{2+}$  sensitive accessions (marked with arrow).  
677 Stereomicroscope images showing normal leaf development in  $\text{Mn}^{2+}$  tolerant  
678 accession (C) and a range of toxicity symptoms (D: chlorosis; E: leaf curling and  
679 chlorosis F: dark brown leaf speckles on 3–4-week-old plants) in  $\text{Mn}^{2+}$  sensitive  
680 accessions. (G) Frequency distributions of  $\text{Mn}^{2+}$  tolerance scores in the 326 *B.*  
681 *napus* accessions of GWAS panel. The tolerance scores are based on the extent  
682 of leaf chlorosis. Each line had four plants/replicate and replicated thrice (12  
683 biological replicates).

684

685 **Figure 2: Genetic diversity, population structure and linkage**  
686 **disequilibrium in the AHGDS panel of *B. napus*.** (A) Circular phylogenetic  
687 tree showing grouping (I-IV) of 326 accessions based on the neighbour-joining  
688 method. (B) population structure of 326 accessions revealed by the Bayesian  
689 method, STRUCTURE. (C) Principal component plots show three predominant  
690 clades of 326 accessions: Australia (I), Europe (II), Asia (III), and others (IV). (D)  
691 Genome and subgenome-wide LD decay plots. The horizontal black lines are  
692 the standard critical  $R^2$  value, and the vertical red, black, and blue lines  
693 represent the AC, A and C subgenomes of *B. napus*.

694

695 **Figure 3: Natural variation in  $\text{Mn}^{2+}$  tolerance loci in *B. napus*.** (A) Manhattan  
696 plots showing SNP associations for  $\text{Mn}^{2+}$  tolerance in a GWAS panel of *B. napus*.  
697 Three genomic regions (A09, C03 and C09) were associated with  $\text{Mn}^{2+}$   
698 tolerance. Only QTL above the threshold–  $\log(\text{p-value}) > 2.5\text{E}^{-8}$  were included in  
699 this figure. The closest candidate gene (with suffix *Bna*) that maps near the



700 highly significant SNP is also shown. (B) QQ plot showing a relationship  
701 between observed (y-axis) and expected (x-axis) LOD scores and a line of fit  
702 (red dashed line). Local linkage disequilibrium (LD) heatmap of the genomic  
703 region containing the most significant SNP associated with Mn<sup>2+</sup> tolerance on  
704 chromosomes A09 (C), C03 (D), and C09 (E). The genomic region is based on  
705 the physical map position of the most significant SNP on the Darmor-*bzh*  
706 reference assembly  $\pm$  10kb. LD estimated as  $r^2$  is shown in colour keys.  
707 Haplotype showing association with Mn<sup>2+</sup> tolerance on chromosome A09 (F)  
708 and C09 (G). Box plots for Mn<sup>2+</sup> tolerance grouped by alleles of the top SNP  
709 markers (maximum LOD scores) on A09, C03 and C09 chromosomes. The  
710 central bold line within the box represents the median; box edges indicate the  
711 upper and lower quartiles; whiskers show the 50% interquartile range, and  
712 points indicate outliers. Two-tailed two-sample Wilcoxon tests determined *P*-  
713 values.

714

715 **Figure 4: Structural variants and their distribution in *BnMTP8.A09***  
716 **(*BnaA09g37250D*) gene.** (A) Schematic representation of the  
717 *BnaA09g37250D* (*BnMTP8.A09*, 1966 bp) gene encoding a cation diffusion  
718 facilitator protein showing seven exons and six introns in black and grey colour,  
719 respectively. The inverted triangle symbols indicate natural population  
720 SNPs/InDels located on *BnaA09g37250D*. The colours of inverted triangle  
721 symbols indicate different variations of functional types. (See detailed  
722 information in Table S4B). B: Annotation and the proportion of SNPs and InDels  
723 of *BnaA09g37250D* in 2289 accessions of *B. napus*. C: Linkage disequilibrium  
724 heatmap of population SNPs/InDels on *BnaA09g37250D*.

725

726 **Figure 5: MTP8 functions in Mn<sup>2+</sup> tolerance in *B. napus*.** (A) Relative  
727 expression levels of *MTP8* in Mn<sup>2+</sup> tolerant (T, n = ) and sensitive (S) lines ( n = )  
728 and (B) of 20 diverse accessions of *B. napus* after 6 days of stress in the 125 $\mu$ M

729  $\text{MnCl}_2 \cdot 4\text{H}_2\text{O}$  and the corresponding control (9 $\mu\text{M}$  of  $\text{MnCl}_2 \cdot 4\text{H}_2\text{O}$ , -ve  $\text{Mn}^{2+}$   
730 treatment). (C) Genetic variation for  $\text{Mn}^{2+}$  tolerance among 20 diverse  
731 accessions of *B. napus*. Chlorosis was measured as 1 (tolerant) to 5 (sensitive)  
732 scale. D: Per cent reduction in chlorophyll content and shoot weights of 20  
733 accessions that show the extreme phenotypes for  $\text{Mn}^{2+}$  tolerance and sensitivity  
734 measured after 3-4 weeks in control nutrient solution (-ve  $\text{Mn}^{2+}$  treatment) and  
735 with 125  $\mu\text{M}$  of  $\text{MnCl}_2 \cdot 4\text{H}_2\text{O}$  (C). Chlorophyll content was measured with SPAD.  
736 Above-ground shoot biomass was measured on a fresh and dry weight basis.  
737 (D) Per cent reduction to control treatment was calculated as the Trait value of  
738  $\text{Mn}^{2+}$  plus treatment minus trait value of the control treatment)/trait value to  
739 control treatment x 100. The means of 12 biological replicates were plotted in  
740 the R package. (E): Phenotypic correlation between  $\text{Mn}^{2+}$  tolerance, chlorophyll  
741 content, and fresh and dry biomass of 20 accessions. (F): Correlation between  
742  $\text{Mn}^{2+}$  tolerance scores and shoot  $\text{Mn}^{2+}$  content.

743

744 **Figure 6: Effect of the *B. napus* *MTP8* expression on tolerance to  $\text{Mn}^{2+}$**   
745 **toxicity.** Yeast cells ( $\text{Mn}^{2+}$  hypersensitive yeast mutant *pmr1* $\Delta$ ) carrying empty  
746 PRS vector, *BnMTP8* gene (BnA09g37250D in PRS vector) were spotted on the  
747 yeast medium (pH 4.4) without  $\text{MnCl}_2$  (control) and with  $\text{MnCl}_2$  concentrations  
748 (6.25, 12.5, 25 and 50 mM). The plates were incubated for 48 h and  
749 photographed.

750

751 **Figure 7: Expression QTL (eQTL) analysis revealing the genetic**  
752 **architecture of  $\text{Mn}^{2+}$  tolerance in *B. napus*.** (A) Manhattan plot of eQTL for  
753 *BnMTP8.A09* in  $\times$  *B. napus* accessions. Each point represents an SNP/InDel in  
754 the *B. napus* GWAS population. The candidate-expressed genes (*BnMATE.C03*,  
755 *BnMTP8.C04* and *BnMTP8.C08*) in *trans*-eQTL which could influence the  
756 expression of *BnMTP8.A09* were marked. (B): Regulatory network of  
757 *BnMTP8.A09* mediated the response to  $\text{Mn}^{2+}$  tolerance in *B. napus*. One *cis*-

758 eQTL and three *trans*-eQTL colocalized with Mn<sup>2+</sup> tolerance QTL on  
759 Chromosomes A09, C03, C04 and C08 indicated that *BnMTP8.A09* play an  
760 important role in Mn<sup>2+</sup> tolerance in *B. napus*. The epistatic effects of the QTL  
761 between A09 and C03/C04/C08/C09 suggest the complex regulatory  
762 mechanism of Mn<sup>2+</sup> tolerance in *B. napus*. The green line (eQTL) next to the  
763 short blue line (candidate gene) indicates the corresponding candidate gene  
764 located in the eQTL region. (C) Geographic distribution of 2,289 *B. napus*  
765 accessions with the allelic variation of target InDel on *BnaA09g37250D*. Each  
766 pie indicates the proportion of *B. napus* accessions with the allelic variation of  
767 target InDel (InDel: A09-26819418) located in *BnaA09g37250D* in six continents,  
768 respectively. The proportion and the number next to each pie indicate the  
769 proportion and total number of accessions with target SNP alleles. Blue and  
770 orange indicate the two allelic variations. “n” is the total number of accessions  
771 with the allelic variation. (D): The violin plot reveals the difference in the gene  
772 expression level of *BnaA09g37250D* between the population allelic variation of  
773 target InDel (InDel: A09-26819418). Box shows the median and interquartile  
774 range values. “n” is the accession number for statistics.

775

776 **Figure 8: *Brassica napus* showing genetic variation for tolerance to Mn<sup>2+</sup>**  
777 **toxicity under field conditions.** A-B: Reshooted plant showing symptoms of  
778 leaf chlorosis; Shattered seeds in plots showing leaf chlorosis in Mn<sup>2+</sup> sensitive  
779 (C-D, *Bnmtp8.A09*) and tolerant (E, *BnMTP8.A09*) doubled haploid lines of  
780 Darmor-*bzh*/Yudal population grown on acidic soil (pH 4.5) at Mangoplak NSW,  
781 Australia.

782

### 783 **Supporting information**

784 **Table S1.** Accessions used to assess natural variation in tolerance to  
785 manganese toxicity in *B. napus*.

786 **Table S2.** Genetic variation for tolerance to Mn<sup>2+</sup> toxicity in the GWAS panel

- 787 **Table S3** Sequence coverage of accessions used for GWAS analysis.
- 788 **Table S4** Principal component analysis of 326 accessions used for genome-  
789 wide association analysis
- 790 **Table S5** Genome-wide association analysis of manganese tolerance in  
791 *Brassica napus* accessions
- 792 **Table S6** Selective sweep analysis of selected 50 accessions of *B. napus* which  
793 showed contrasting variation in Mn<sup>2+</sup> tolerance
- 794 **Table S7** Segregation ratio of F<sub>2</sub> populations derived from five crosses. Mn<sup>2+</sup>  
795 tolerance was evaluated in a nutrient solution supplemented with 125 μM MnCl<sub>2</sub>  
796 (pH4.5). \*: Non-significant. -: Data not suited for Chi-squared test
- 797 **Table S8** Candidate genes associated with manganese tolerance to manganese  
798 toxicity in a genome-wide association panel of 326 *B. napus* accessions
- 799 **Table S9** *BnaMTP8* homeologous genes in the reference genomes (cv. Darmor-  
800 *bzh* and ZS1).
- 801 **Table S10.** Diverse accessions used for *BnMTP08.A09* gene expression using  
802 RT-PCR. T: Mn<sup>2+</sup> tolerant and S: Mn<sup>2+</sup> sensitive.
- 803 **Table S11** List of primers used for sequencing of *MTP8* gene on A09 and  
804 quantitative RT-PCR.
- 805 **Table S12.** eQTL associated with manganese tolerance in *B. napus*.
- 806

807 **Figure S1:** Selective sweep and physical mapping of GWAS-SNPs associated  
808 with Mn<sup>2+</sup> tolerance. A: Selective sweep signals between 25 Mn<sup>2+</sup> tolerant and  
809 25 Mn<sup>2+</sup> sensitive accessions of *B. napus*. The dashed line represents the  
810 thresholds (top 5% of FST values) between 25 Mn<sup>2+</sup> tolerant (group 2) and 25  
811 Mn<sup>2+</sup> sensitive (group 1) accessions of *B. napus*. The physical locations of  
812 significantly associated markers on chromosome A09 (B), C03 (C) and C09 (D)  
813 with Mn<sup>2+</sup> tolerance; the closest markers and candidate genes are in green and  
814 red, respectively. The position of whole genome resequencing-based markers  
815 (with WGR suffix) is given in base pairs. String analyses of candidate genes  
816 (MTP8, AT3G58060 on A09, E; TMN1 on C03, F and ABCC5 on C09, G)  
817 associated with Mn<sup>2+</sup> tolerance in *B. napus* showing both physical interactions  
818 and functional associations between known and predicted proteins interactions.

819

820 **Figure S2.** Frequency distributions of manganese tolerance scores in the F<sub>2</sub>  
821 populations derived from P3083/ZY003 (A), Mutu/RSO94-67, (B), Darmor/Mutu  
822 (C) and Darmor/Jet Neuf (D)). F<sub>2</sub> lines were evaluated for Mn<sup>2+</sup> tolerance in a  
823 nutrient solution (Raman et al 2017) supplemented with MnCl<sub>2</sub> (125 μmolar, pH  
824 4.5).

825

826 **Figure S3.** Physical localisation of significantly associated DArTseq markers  
827 with manganese tolerance in *B. napus* F<sub>2</sub> population derived from A: P3083  
828 (China, tolerant to Mn<sup>2+</sup>) × ZY003 (China, sensitive to Mn<sup>2+</sup>).

829

830 **Figure S4.** Phylogenetic and sequence analyses of the *BnMTP8.A09* gene. A:  
831 Sequence variation in the BnaA09g37250D (*BnMTP8.A09*, 1966 bp) gene  
832 encoding cation diffusion facilitator protein in Darmor-*bzh* (Mn<sup>2+</sup> tolerant), Yudal  
833 (Mn<sup>2+</sup> sensitive) and selected doubled haploid lines (10 tolerant: T and 10  
834 sensitives, S) derived from Darmor-*bzh*/Yudal. Seven exons and six introns are  
835 shown in blue and black, respectively. B: Gene structure and population

836 SNPs/InDels distribution of six *BnMTP8*. C: Phylogenetic analysis of  
837 *BnMTP8.A09* homologues in *B. napus* and its ancestral diploid species. The  
838 tree was drawn using the neighbour-joining method in Geneious for MTP8  
839 amino acid sequences from *B. rapa*, *B. oleracea* and *B. napus*. Arabidopsis  
840 *MTP8* gene was used as an outgroup. *BnMTP8* homologue that showed  
841 significant association with Mn<sup>2+</sup> tolerance is labelled red.

842

843 **Figure S5.** *BnMTP8.A09* expression difference in Darmor-*bzh* (Mn<sup>2+</sup> tolerant),  
844 Yudal (Mn<sup>2+</sup> sensitive) and selected doubled haploid lines (11 tolerant: T and 11  
845 sensitives, S) derived from Darmor-*bzh*/Yudal population are presented in Table  
846 Sx; Primer-pair used for *BnMTP8.A09* gene sequencing is given in  
847 supplementary Table 11.

848

849 **Figure S6.** Micronutrient analysis of selected 19 diverse *B. napus* lines which  
850 showed contrasting phenotypes for Mn<sup>2+</sup> tolerance in nutrient solution.  
851 Micronutrients were determined by Inductively coupled plasma atomic emission  
852 spectrometry, following Delhaize et al (2007) at the Charles Sturt University,  
853 Wagga Wagga, Australia.

854

855 **Figure S7.** Structural variants and their distribution in *BnMTP8.A09*  
856 (*BnaA09g37250D*) gene. A: Different tissue types used for RNA library  
857 construction. B: Expression patterns of *MTP8* homologues in different tissue  
858 types e variants in the population; C: The violin plot reveals the difference of  
859 gene expression level of *BnMTP8.A09* between the population allelic variation  
860 of target InDel (A09-26819418). C Dendrogram showing the grouping of InDel  
861 AT/A among winter, semi-winter and spring lines. D: Frequency of InDel among  
862 different *B. napus* ecotypes. E: The violin plot reveals the difference in seed oil  
863 content between the population allelic variation of target InDel (A09-26819418)  
864 located in *BnMTP8.A09*. Box shows the median and interquartile range values.

865 “n” is the accession number for statistics. Seed oil content data from (Tang et  
866 al., 2021).  $p$ -value:  $5.196e-05$  ( $t$ -test); 0.0338 (Wilcoxon-test).

867

868 **Figure S8.** Experimental design of doubled haploid lines (DH) from Darmor-  
869 *bzh*/Yudal implemented at the Mangoplah field site, NSW, Australia (A) and  
870 climate data of 2022 season (B). The trial was sown on 25<sup>th</sup> April and harvested  
871 in December.

872

873 **Figure S9.** Selective sweep analysis of *BnMTP8.A09* gene in a GWAS panel of  
874 *B. napus*.  $F_{st}$  (A) and Diversity:  $\pi$  (B) analyses were performed using *B. napus*  
875 cv. ZS11 reference assembly.

876

## 877 **Funding**

878 We thank NSW DPI and GRDC for supporting this research, partly under the  
879 National Brassica Germplasm Improvement Programs (DAN00208, and  
880 DPI2204-021RTX) led by HR. NK and BJP acknowledge the support of the ARC  
881 Training Centre for Future Crops Development (IC210100047).

882

883

## 884 **Reference**

885 ANDOLFO, G., RUOCCO, M., DI DONATO, A., FRUSCIANTE, L., LORITO, M., SCALA, F. &  
886 ERCOLANO, M. R. 2015. Genetic variability and evolutionary diversification of membrane  
887 ABC transporters in plants. *BMC Plant Biol*, 15, 51.

888 ANTEBI, A. & FINK, G. R. 1992. The yeast Ca(2+)-ATPase homologue, PMR1, is required for normal  
889 Golgi function and localizes in a novel Golgi-like distribution. *Mol Biol Cell*, 3, 633-54.

890 BASU, U., GOOD, A. G. & TAYLOR, G. J. 2001. Transgenic *Brassica napus* plants overexpressing  
891 aluminium-induced mitochondrial manganese superoxide dismutase cDNA are resistant  
892 to aluminium. *Plant Cell Environ.*, 24, 1269-1278.

893 BERGMANN, W. 1992. *Nutritional disorders of plants: development, visual and analytical diagnosis*,  
894 Zeiglhainer Str. 58, 6900 Jena, Germany., Gustav Fischer Verlag

895

896 BLOOM, A. J. & LANCASTER, K. M. 2018. Manganese binding to Rubisco could drive a  
897 photorespiratory pathway that increases the energy efficiency of photosynthesis. *Nature*  
898 *Plants*, 4, 414-422.

- 899 CASTAINGS, L., ALCON, C., KOSUTH, T., CORREIA, D. & CURIE, C. 2021. Manganese triggers  
900 phosphorylation-mediated endocytosis of the Arabidopsis metal transporter NRAMP1.  
901 *The Plant Journal*, 106, 1328-1337.
- 902 CHALHOUB, B., DENOEUDE, F., LIU, S., PARKIN, I. A., TANG, H., WANG, X., CHIQUET, J., BELCRAM,  
903 H., TONG, C., SAMANS, B., CORREA, M., DA SILVA, C., JUST, J., FALENTIN, C., KOH, C. S.,  
904 LE CLAINCHE, I., BERNARD, M., BENTO, P., NOEL, B., LABADIE, K., ALBERTI, A., CHARLES,  
905 M., ARNAUD, D., GUO, H., DAVIAUD, C., ALAMERY, S., JABBARI, K., ZHAO, M., EDGER, P.  
906 P., CHELAIFA, H., TACK, D., LASSALLE, G., MESTIRI, I., SCHNEL, N., LE PASLIER, M. C., FAN,  
907 G., RENAULT, V., BAYER, P. E., GOLICZ, A. A., MANOLI, S., LEE, T. H., THI, V. H., CHALABI,  
908 S., HU, Q., FAN, C., TOLLENAERE, R., LU, Y., BATTAIL, C., SHEN, J., SIDEBOTTOM, C. H.,  
909 WANG, X., CANAGUIER, A., CHAUVEAU, A., BERARD, A., DENIOT, G., GUAN, M., LIU, Z.,  
910 SUN, F., LIM, Y. P., LYONS, E., TOWN, C. D., BANCROFT, I., WANG, X., MENG, J., MA, J.,  
911 PIRES, J. C., KING, G. J., BRUNEL, D., DELOURME, R., RENARD, M., AURY, J. M., ADAMS, K.  
912 L., BATLEY, J., SNOWDON, R. J., TOST, J., EDWARDS, D., ZHOU, Y., HUA, W., SHARPE, A.  
913 G., PATERSON, A. H., GUAN, C. & WINCKER, P. 2014. Early allopolyploid evolution in the  
914 post-Neolithic *Brassica napus* oilseed genome. *Science*, 345, 950-3.
- 915 CHEN, Z., FUJII, Y., YAMAJI, N., MASUDA, S., TAKEMOTO, Y., KAMIYA, T., YUSUYIN, Y., IWASAKI, K.,  
916 KATO, S., MAESHIMA, M., MA, J. F. & UENO, D. 2013. Mn tolerance in rice is mediated by  
917 MTP8.1, a member of the cation diffusion facilitator family. *J Exp Bot*, 64, 4375-87.
- 918 CHU, H.-H., CAR, S., SOCHA, A. L., HINDT, M. N., PUNSHON, T. & GUERINOT, M. L. 2017. The  
919 Arabidopsis MTP8 transporter determines the localization of manganese and iron in seeds.  
920 *Scientific Reports*, 7, 11024.
- 921 CLOUGH, S. J. & BENT, A. F. 1998. Floral dip: a simplified method for Agrobacterium-mediated  
922 transformation of Arabidopsis thaliana. *Plant J*, 16, 735-43.
- 923 DE CAROLI, M., FURINI, A., DALCORSO, G., ROJAS, M. & DI SANSEBASTIANO, G.-P. 2020.  
924 Endomembrane Reorganization Induced by Heavy Metals. *Plants*, 9, 482.
- 925 DELHAIZE, E., GRUBER, B. D., PITTMAN, J. K., WHITE, R. G., LEUNG, H., MIAO, Y., JIANG, L., RYAN,  
926 P. R. & RICHARDSON, A. E. 2007. A role for the AtMTP11 gene of Arabidopsis in  
927 manganese transport and tolerance. *The Plant Journal*, 51, 198-210.
- 928 DELHAIZE, E., KATAOKA, T., HEBB, D. M., WHITE, R. G. & RYAN, P. R. 2003. Genes encoding proteins  
929 of the cation diffusion facilitator family that confer manganese tolerance. *PLANT CELL*, 15,  
930 1131-1142.
- 931 DÜRR, G., STRAYLE, J., PLEMPER, R., ELBS, S., KLEE, S. K., CATTY, P., WOLF, D. H. & RUDOLPH, H.  
932 K. 1998. The medial-Golgi ion pump Pmr1 supplies the yeast secretory pathway with Ca<sup>2+</sup>  
933 and Mn<sup>2+</sup> required for glycosylation, sorting, and endoplasmic reticulum-associated  
934 protein degradation. *Mol Biol Cell*, 9, 1149-62.
- 935 EROGLU, S., MEIER, B., VON WIRÉN, N. & PEITER, E. 2016. The Vacuolar Manganese Transporter  
936 MTP8 Determines Tolerance to Iron Deficiency-Induced Chlorosis in Arabidopsis. *Plant*  
937 *Physiol*, 170, 1030-45.
- 938 FARTHING, E. C., HENBEST, K. C., GARCIA-BECERRA, T., PEASTON, K. A. & WILLIAMS, L. E. 2023.  
939 Dissecting the relative contribution of ECA3 and group 8/9 cation diffusion facilitators to  
940 manganese homeostasis in Arabidopsis thaliana. *Plant Direct*, 7, e495.
- 941 FECHT-CHRISTOFFERS, M. M., FÜHRS, H., BRAUN, H. P. & HORST, W. J. 2006. The role of hydrogen  
942 peroxide-producing and hydrogen peroxide-consuming peroxidases in the leaf apoplast



- 943 of cowpea in manganese tolerance. *Plant Physiol*, 140, 1451-63.
- 944 FERNANDO, D. R. & LYNCH, J. P. 2015. Manganese phytotoxicity: new light on an old problem.  
945 *Ann Bot*, 116, 313-9.
- 946 FOY, C., D. 1983. Plant adaptation to mineral stress in problem soils. *Iowa State J. Res.*, 57, 355-  
947 391.
- 948 FOY, C. D. 1984. Physiological effects of hydrogen, aluminium and manganese toxicities in acid  
949 soil. In: ADAMS, F. (ed.) *Soil Acidity and Liming*. Madison: Am Soc Agron.
- 950 GÓMEZ-CAMPO, C. & PRAKASH, S. 1999. Origin and domestication. In: GÓMEZ-CAMPO, C. (ed.)  
951 *Developments in Plant Genetics and Breeding*. Elsevier.
- 952 GU, D., ZHOU, X., MA, Y., XU, E., YU, Y., LIU, Y., CHEN, X. & ZHANG, W. 2021. Expression of a  
953 Brassica napus metal transport protein (BnMTP3) in Arabidopsis thaliana confers tolerance  
954 to Zn and Mn. *Plant Science*, 304, 110754.
- 955 GU, D., ZHOU, X., YIN, X., WU, M., CHEN, W., XU, E., LIU, Y., GONG, C., ZHANG, W. & CHEN, X.  
956 2022. Metal tolerance protein family members are involved in Mn homeostasis through  
957 internal compartmentation and exocytosis in Brassica napus. *Environmental and*  
958 *Experimental Botany*, 195, 104785.
- 959 HARRISON, S. J., MOTT, E. K., PARSLEY, K., ASPINALL, S., GRAY, J. C. & COTTAGE, A. 2006. A rapid  
960 and robust method of identifying transformed Arabidopsis thaliana seedlings following  
961 floral dip transformation. *Plant Methods*, 2, 19.
- 962 HOLLAND, J. B. 2007. Genetic architecture of complex traits in plants. *Current Opinion in Plant*  
963 *Biology*, 10, 156-161.
- 964 HORIGUCHI, T. 1988. Mechanism of manganese toxicity and tolerance of plants. *Soil Science and*  
965 *Plant Nutrition*, 34:1, 65-73, DOI: 10.1080/00380768.1988.10415580.
- 966 HORST, W. J. 1988. The Physiology of Manganese Toxicity. In: GRAHAM, R. D., HANNAM, R. J. &  
967 UREN, N. C. (eds.) *Manganese in Soils and Plants: Proceedings of the International*  
968 *Symposium on 'Manganese in Soils and Plants' held at the Waite Agricultural Research*  
969 *Institute, The University of Adelaide, Glen Osmond, South Australia, August 22-26, 1988*  
970 *as an Australian Bicentennial Event*. Dordrecht: Springer Netherlands.
- 971 KANG, H. M., SUL, J. H., SERVICE, S. K., ZAITLEN, N. A., KONG, S. Y., FREIMER, N. B., SABATTI, C. &  
972 ESKIN, E. 2010. Variance component model to account for sample structure in genome-  
973 wide association studies. *Nature Genetics*, 42, 348-U110.
- 974 KASSEM, M. A., MEKSEM, K., KANG, C. H., NJITI, V. N., KILO, V., WOOD, A. J. & LIGHTFOOT, D. A.  
975 2004. Loci underlying resistance to manganese toxicity mapped in a soybean recombinant  
976 inbred line population of 'Essex2019; x 'Forrest'. *Plant and Soil*, 260, 197-204.
- 977 KHAN, A. A. & MCNEILLY, T. 1998. Variability in aluminium and manganese tolerance among maize  
978 accessions. *Genetic Resources and Crop Evolution*, 45, 525-531.
- 979 KLEIN, M., BURLA, B. & MARTINOIA, E. 2006. The multidrug resistance-associated protein  
980 (MRP/ABCC) subfamily of ATP-binding cassette transporters in plants. *FEBS Lett*, 580,  
981 1112-22.
- 982 KOCHIAN, L. V. 1995. Cellular mechanisms of aluminum toxicity and resistance in plants. *Annu.*  
983 *Rev. Plant Physiol. Plant Mol. Biol.*, 46, 237-260.
- 984 LEMTIRI-CHLIEH, F., MACROBBIE, E. A. C. & BREARLEY, C. A. 2000. Inositol hexakisphosphate is a  
985 physiological signal regulating the K<sup>+</sup>-inward rectifying conductance in  
986 guard cells. *Proceedings of the National Academy of Sciences*, 97, 8687-8692.

- 987 LEUNG, K. P., LUO, M., GAO, C., ZENG, Y., ZHAO, Q., CHYE, M.-L., YAO, X. & JIANG, L. 2019.  
988 Arabidopsis ENDOMEMBRANE PROTEIN 12 contributes to the endoplasmic reticulum  
989 stress response by regulating K/HDEL receptor trafficking. *The Plant cell*, tpc.00913.2018.
- 990 LI, H. & DURBIN, R. 2009. Fast and accurate short read alignment with Burrows-Wheeler transform.  
991 *Bioinformatics*, 25, 1754-1760.
- 992 LI, J., DONG, R., JIA, Y., HUANG, J., ZOU, X., AN, N., SONG, J. & CHEN, Z. 2021. Characterization of  
993 Metal Tolerance Proteins and Functional Analysis of GmMTP8.1 Involved in Manganese  
994 Tolerance in Soybean *Frontiers in plant science*, . 12, 683813-683813.
- 995 LI, J., JIA, Y., DONG, R., HUANG, R., LIU, P., LI, X., WANG, Z., LIU, G. & CHEN, Z. 2019. Advances in  
996 the Mechanisms of Plant Tolerance to Manganese Toxicity. *International Journal of*  
997 *Molecular Sciences*, 20, 5096.
- 998 LU, K., WEI, L., LI, X., WANG, Y., WU, J., LIU, M., ZHANG, C., CHEN, Z., XIAO, Z., JIAN, H., CHENG, F.,  
999 ZHANG, K., DU, H., CHENG, X., QU, C., QIAN, W., LIU, L., WANG, R., ZOU, Q., YING, J., XU,  
1000 X., MEI, J., LIANG, Y., CHAI, Y.-R., TANG, Z., WAN, H., NI, Y., HE, Y., LIN, N., FAN, Y., SUN,  
1001 W., LI, N.-N., ZHOU, G., ZHENG, H., WANG, X., PATERSON, A. H. & LI, J. 2019. Whole-  
1002 genome resequencing reveals Brassica napus origin and genetic loci involved in its  
1003 improvement. *Nature Communications*, 10, 1154.
- 1004 MARSCHNER, H. 1995. Mineral Nutrition of Higher Plants. *Academic Press, 2012 - Nature - 651*  
1005 *pages*.
- 1006 MILLS, R. F., DOHERTY, M. L., LÓPEZ-MARQUÉS, R. L., WEIMAR, T., DUPREE, P., PALMGREN, M. G.,  
1007 PITTMAN, J. K. & WILLIAMS, L. E. 2008. ECA3, a Golgi-localized P2A-type ATPase, plays a  
1008 crucial role in manganese nutrition in Arabidopsis. *Plant Physiol*, 146, 116-28.
- 1009 MIZUNO, T., HIRANO, K., KATO, S. & OBATA, H. 2008. Cloning of ZIP family metal transporter  
1010 genes from the manganese hyperaccumulator plant Chengioplanax sciadophyloides, and  
1011 its metal transport and resistance abilities in yeast. *Soil Science and Plant Nutrition*, 54,  
1012 86-94.
- 1013 MORONI, J. S., SCOTT, B. J. & WRATTEN, N. 2003. Differential tolerance of high manganese among  
1014 rapeseed genotypes. *Plant and Soil*, 253, 507-519.
- 1015 NOOR, I., SOHAIL, H., ZHANG, D., ZHU, K., SHEN, W., PAN, J., HASANUZZAMAN, M., LI, G. & LIU,  
1016 J. 2023. Silencing of *PpNRAMP5* improves manganese toxicity tolerance in peach (*Prunus*  
1017 *persica*) seedlings. *J Hazard Mater*, 454, 131442.
- 1018 PEITER, E., MONTANINI, B., GOBERT, A., PEDAS, P., HUSTED, S., MAATHUIS, F. J. M., BLAUDEZ, D.,  
1019 CHALOT, M. & SANDERS, D. 2007. A secretory pathway-localized cation diffusion  
1020 facilitator confers plant manganese tolerance. *Proceedings of the National Academy of*  
1021 *Sciences*, 104, 8532-8537.
- 1022 PILET, M. L., DELOURME, R., FOISSET, N. & RENARD, M. 1998. Identification of loci contributing to  
1023 quantitative field resistance to blackleg disease, causal agent *Leptosphaeria maculans*  
1024 (Desm.) Ces. et de Not., in winter rapeseed (*Brassica napus* L.). *Theor Appl Genet*, 96, 23-  
1025 30.
- 1026 PINEAU, C., LOUBET, S., LEFOULON, C., CHALIES, C., FIZAMES, C., LACOMBE, B., FERRAND, M.,  
1027 LOUDET, O., BERTHOMIEU, P. & RICHARD, O. 2012. Natural variation at the FRD3 MATE  
1028 transporter locus reveals cross-talk between Fe homeostasis and Zn tolerance in  
1029 Arabidopsis thaliana. *PLoS Genet*, 8, e1003120.
- 1030 PRADEEP, K., BELL, R. W. & VANCE, W. 2020. Variation of Cicer Germplasm to Manganese Toxicity

- 1031 Tolerance. *Front Plant Sci*, 11, 588065.
- 1032 PRAKASH, S., WU, X.-M. & BHAT, S. R. 2011. *History, Evolution, and Domestication of Brassica*
- 1033 *Crops*.
- 1034 PURCELL, S., NEALE, B., TODD-BROWN, K., THOMAS, L., FERREIRA, M. A. R., BENDER, D., MALLER,
- 1035 J., SKLAR, P., DE BAKKER, P. I. W., DALY, M. J. & SHAM, P. C. 2007. PLINK: A tool set for
- 1036 whole-genome association and population-based linkage analyses. *American Journal of*
- 1037 *Human Genetics*, 81, 559-575.
- 1038 RAMAN, H., RAMAN, R., MATHEWS, K., DIFFEY, S. & SALISBURY, P. 2020. QTL mapping reveals
- 1039 genomic regions for yield based on an incremental tolerance index to drought stress and
- 1040 related agronomic traits in canola. *Crop and Pasture Science* 71(6) 562-577,
- 1041 <https://doi.org/10.1071/CP20046>.
- 1042 RAMAN, H., RAMAN, R., MCVITTIE, B., ORCHARD, B., QIU, Y. & DELOURME, R. 2017. A major locus
- 1043 for manganese tolerance maps on chromosome A09 in a doubled haploid population of
- 1044 *Brassica napus* L. *Frontiers in Plant Science*, 8, <https://doi.org/10.3389/fpls.2017.01952>.
- 1045 RAMAN, H., RAMAN, R., QIU, Y., YADAV, A. S., SURESHKUMAR, S., BORG, L., ROHAN, M., WHEELER,
- 1046 D., OWEN, O., MENZ, I. & BALASUBRAMANIAN, S. 2019. GWAS hints at pleiotropic roles
- 1047 for FLOWERING LOCUS T in flowering time and yield-related traits in canola. *BMC*
- 1048 *Genomics* 20, 636 (2019). <https://doi.org/10.1186/s12864-019-5964-y>, 20, 636.
- 1049 RAMAN, R., DIFFEY, S., CARLING, J., COWLEY, R., KILIAN, A., LUCKETT, D. & RAMAN, H. 2016.
- 1050 Quantitative genetic analysis of yield in an Australian *Brassica napus* doubled haploid
- 1051 population. *Crop & Pasture Science* 67, 298-307.
- 1052 ROGERS, E. E. & GUERINOT, M. L. 2002. FRD3, a Member of the Multidrug and Toxin Efflux Family,
- 1053 Controls Iron Deficiency Responses in Arabidopsis. *The Plant Cell*, 14, 1787-1799.
- 1054 SCHAAF, G., CATONI, E., FITZ, M., SCHWACKE, R., SCHNEIDER, A., WIREN, N. & FROMMER, W. B.
- 1055 2002. A Putative Role for the Vacuolar Calcium/Manganese Proton Antiporter AtCAX2 in
- 1056 Heavy Metal Detoxification. *Plant Biology*, 4, 612-618.
- 1057 SONG, J.-M., GUAN, Z., HU, J., GUO, C., YANG, Z., WANG, S., LIU, D., WANG, B., LU, S., ZHOU, R.,
- 1058 XIE, W.-Z., CHENG, Y., ZHANG, Y., LIU, K., YANG, Q.-Y., CHEN, L.-L. & GUO, L. 2020. Eight
- 1059 high-quality genomes reveal pan-genome architecture and ecotype differentiation of
- 1060 *Brassica napus*. *Nature Plants*, 6, 34-45.
- 1061 SPARROW, L. A. & UREN, N. C. 1987. Oxidation and reduction of Mn in acidic soils: Effect of
- 1062 temperature and soil pH. *Soil Biology and Biochemistry*, 19, 143-148.
- 1063 TANG, S., ZHAO, H., LU, S., YU, L., ZHANG, G., ZHANG, Y., YANG, Q.-Y., ZHOU, Y., WANG, X., MA,
- 1064 W., XIE, W. & GUO, L. 2021. Genome- and transcriptome-wide association studies provide
- 1065 insights into the genetic basis of natural variation of seed oil content in *Brassica napus*.
- 1066 *Molecular Plant*, 14, 470-487.
- 1067 TSUNEMITSU, Y., GENGA, M., OKADA, T., YAMAJI, N., MA, J. F., MIYAZAKI, A., KATO, S. I., IWASAKI,
- 1068 K. & UENO, D. 2018. A member of cation diffusion facilitator family, MTP11, is required
- 1069 for manganese tolerance and high fertility in rice. *Planta*, 248, 231-241.
- 1070 TURSI, A. 2019. A review on biomass: importance, chemistry, classification, and conversion. *Biofuel*
- 1071 *Research Journal*, 6, 962-979.
- 1072 UPADHYAY, N., KAR, D., DEEPAK MAHAJAN, B., NANDA, S., RAHIMAN, R., PANCHAKSHARI, N.,
- 1073 BHAGAVATULA, L. & DATTA, S. 2019. The multitasking abilities of MATE transporters in
- 1074 plants. *J Exp Bot*, 70, 4643-4656.

- 1075 WRATTEN, N. & SCOTT, B. J. 1979. Manganese tolerance in rape. *Field Crops Newsletter*, 14, 55-  
1076 57.
- 1077 WU, D., LIANG, Z., YAN, T., XU, Y., XUAN, L., TANG, J., ZHOU, G., LOHWASSER, U., HUA, S., WANG,  
1078 H., CHEN, X., WANG, Q., ZHU, L., MAODZEKA, A., HUSSAIN, N., LI, Z., LI, X., SHAMSI, I. H.,  
1079 JILANI, G., WU, L., ZHENG, H., ZHANG, G., CHALHOUB, B., SHEN, L., YU, H. & JIANG, L.  
1080 2019. Whole-Genome Resequencing of a Worldwide Collection of Rapeseed Accessions  
1081 Reveals the Genetic Basis of Ecotype Divergence. *Mol Plant*, 12, 30-43.
- 1082 YANG, Z. W., SHENGBO LULU WEI, YIMING HUANG, DONGXU LIU, YUPENG JIA, CHENGFANG  
1083 LUO, YUCHEN LIN, CONGYUAN LIANG, YUE HU, CHENG DAI, LIANG GUO, YONGMING  
1084 ZHOU, QING-YONG YANG 2023. BnIR: a multi-omics database with various tools for  
1085 Brassica napus research and breeding, . *Molecular Plant* 16(4):775-789. doi:  
1086 <https://doi.org/10.1016/j.molp.2023.03.007>.
- 1087 ZHANG, H., ZHAO, F. G., TANG, R. J., YU, Y., SONG, J., WANG, Y., LI, L. & LUAN, S. 2017. Two  
1088 tonoplast MATE proteins function as turgor-regulating chloride channels in Arabidopsis.  
1089 *Proc Natl Acad Sci U S A*, 114, E2036-e2045.
- 1090 ZHANG, X., HENRIQUES, R., LIN, S. S., NIU, Q. W. & CHUA, N. H. 2006. Agrobacterium-mediated  
1091 transformation of Arabidopsis thaliana using the floral dip method. *Nat Protoc*, 1, 641-6.
- 1092 ZHANG, Z. 2022. KaKs\_Calculator 3.0: Calculating Selective Pressure on Coding and Non-coding  
1093 Sequences. *Genomics, Proteomics & Bioinformatics*, 20, 536-540.
- 1094 ZHOU, X. & STEPHENS, M. 2012. Genome-wide efficient mixed-model analysis for association  
1095 studies. *Nature Genetics*, 44, 821-824.

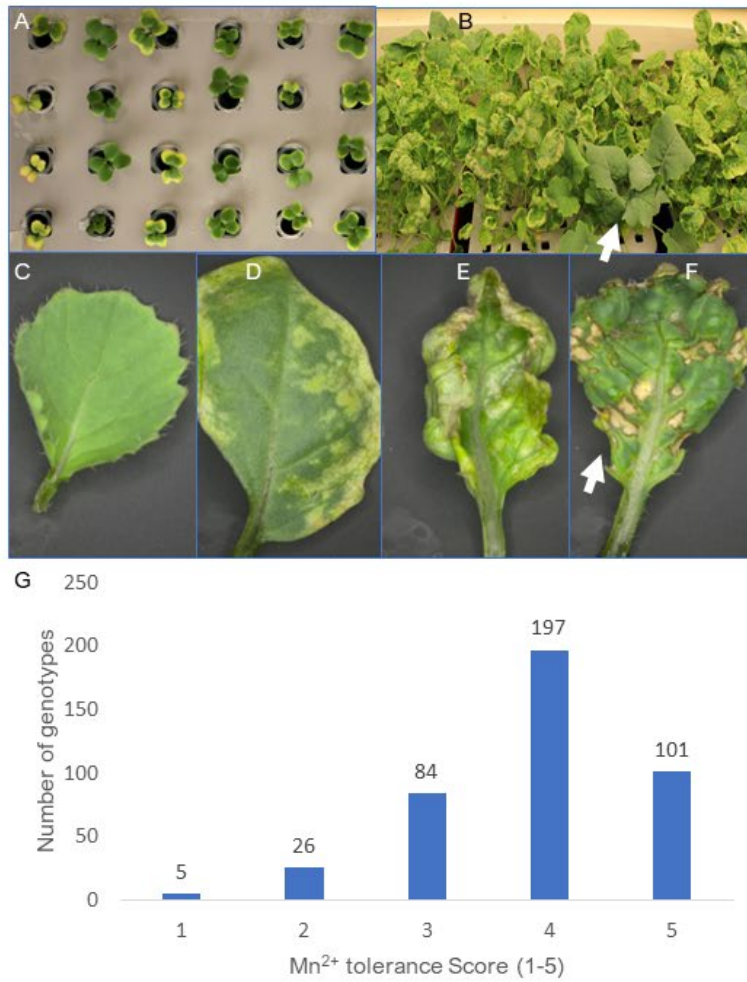

**Figure 1**

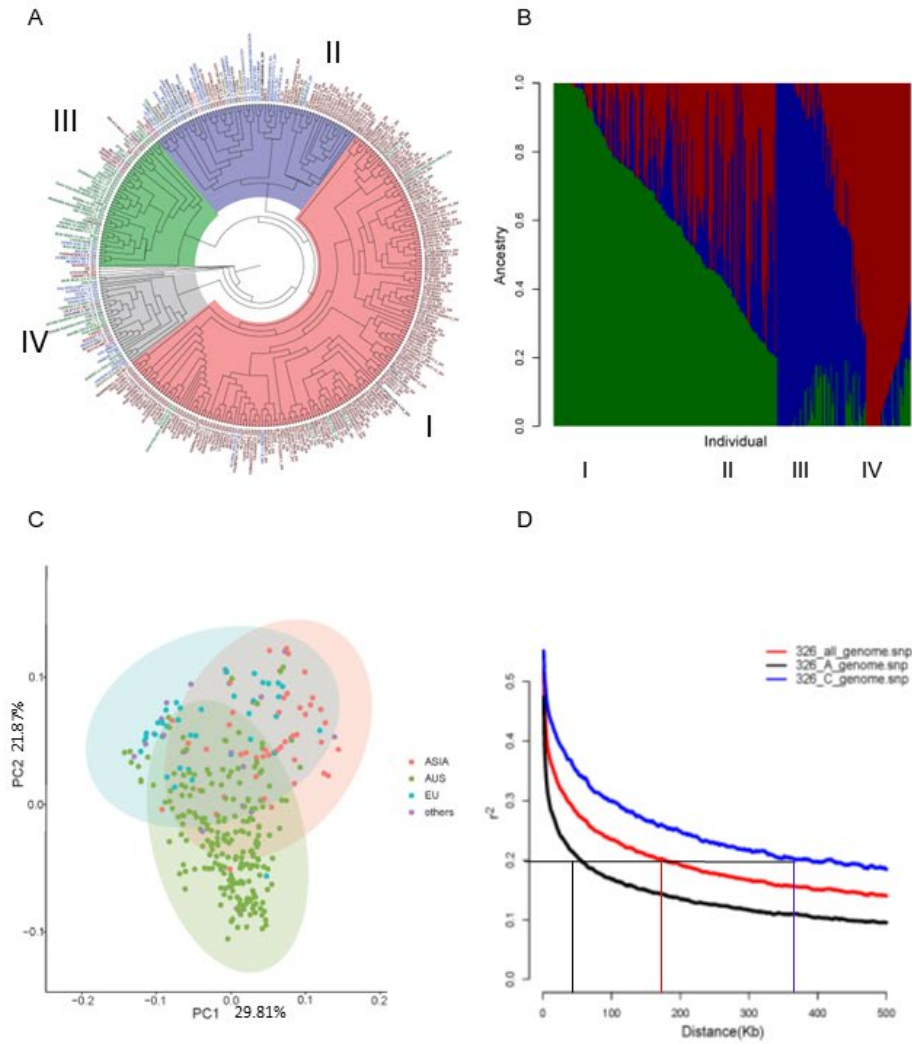

Figure 2

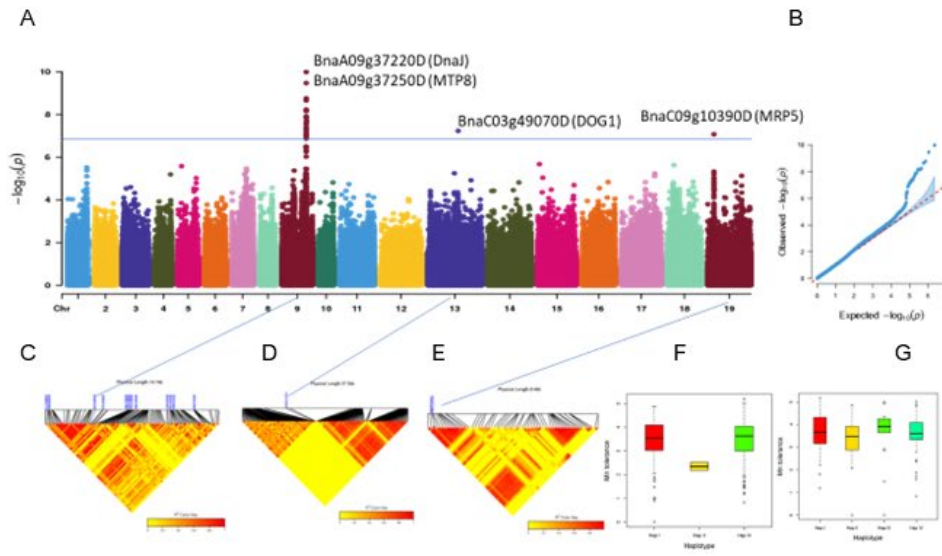

Figure 3

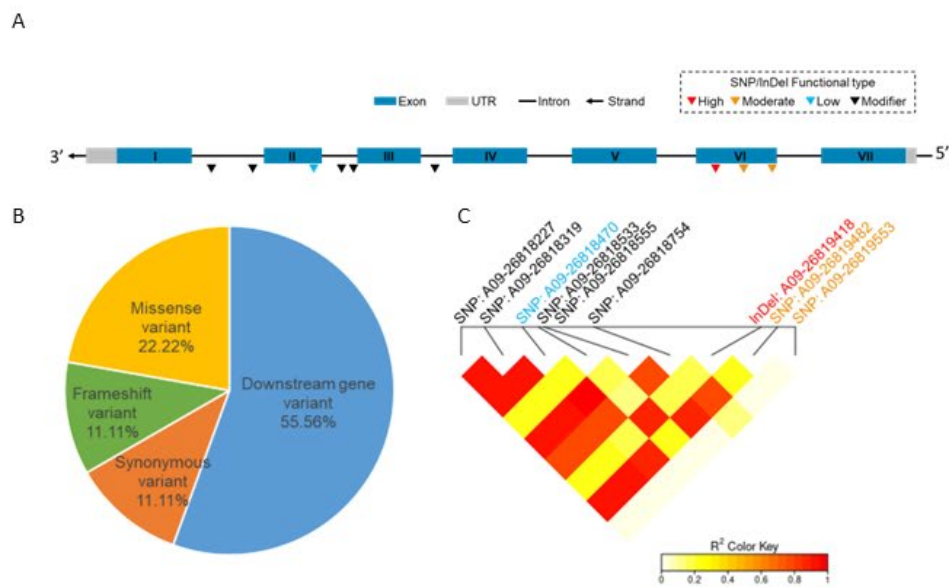

Figure 4



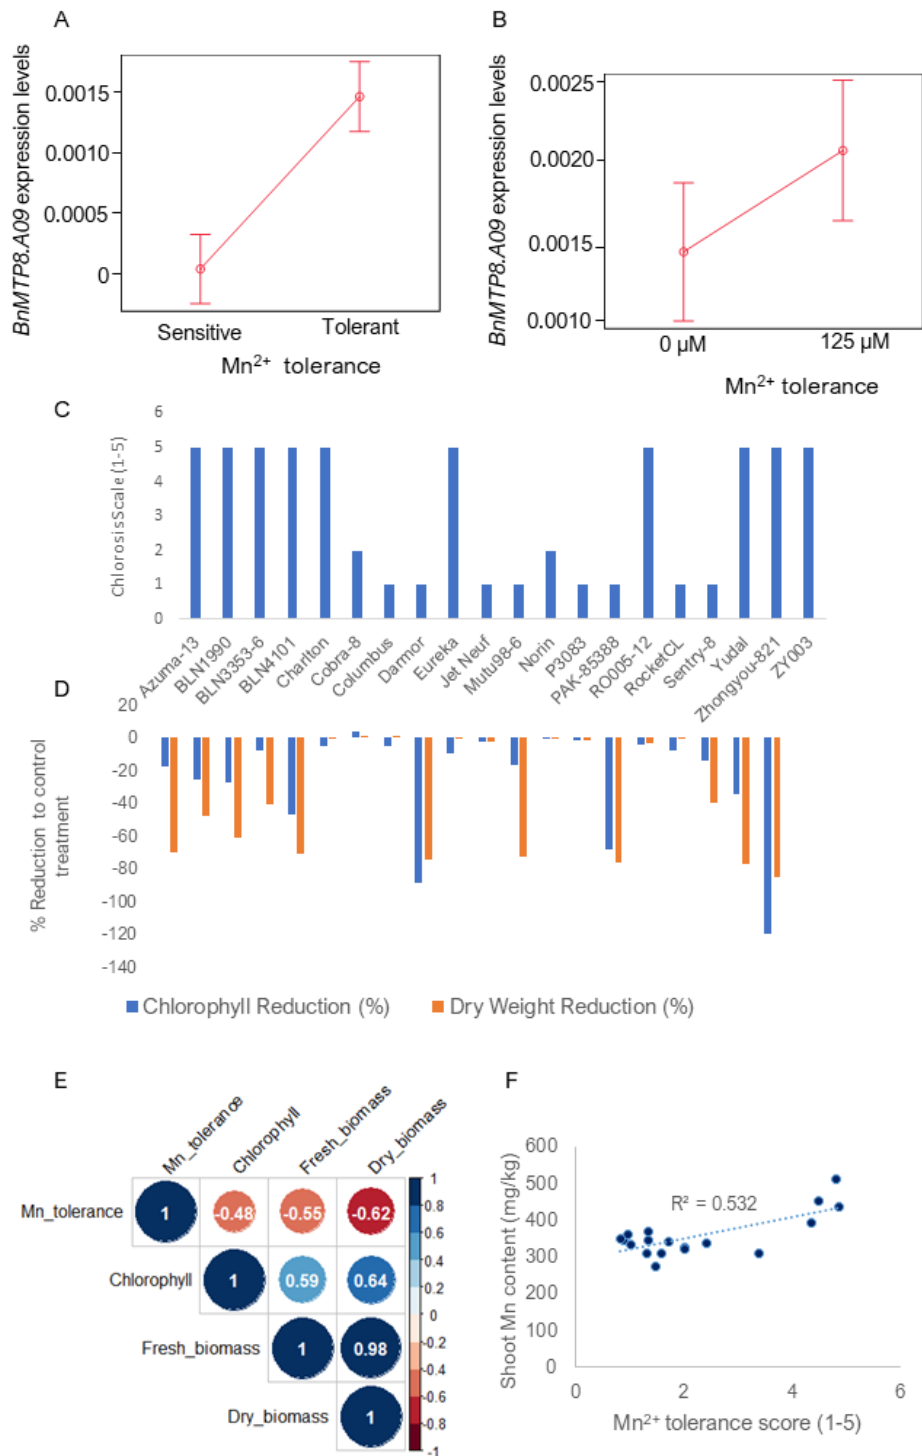

Figure 5

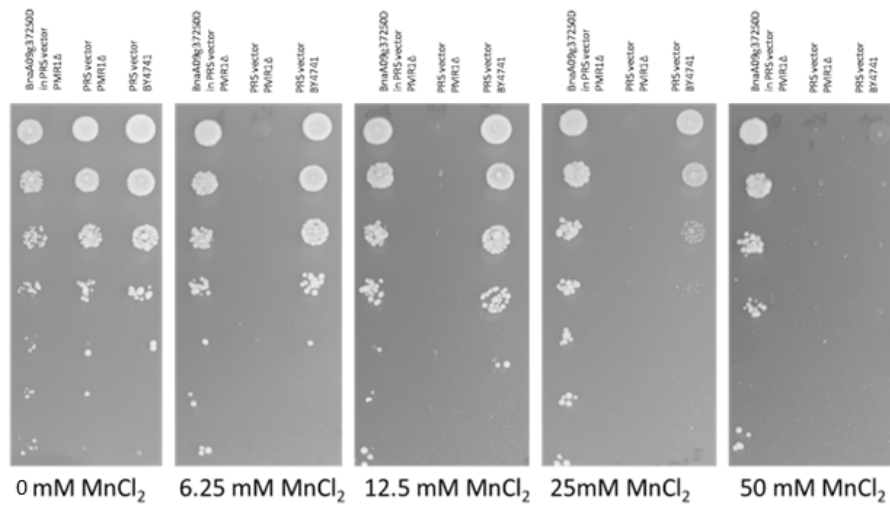

Figure 6

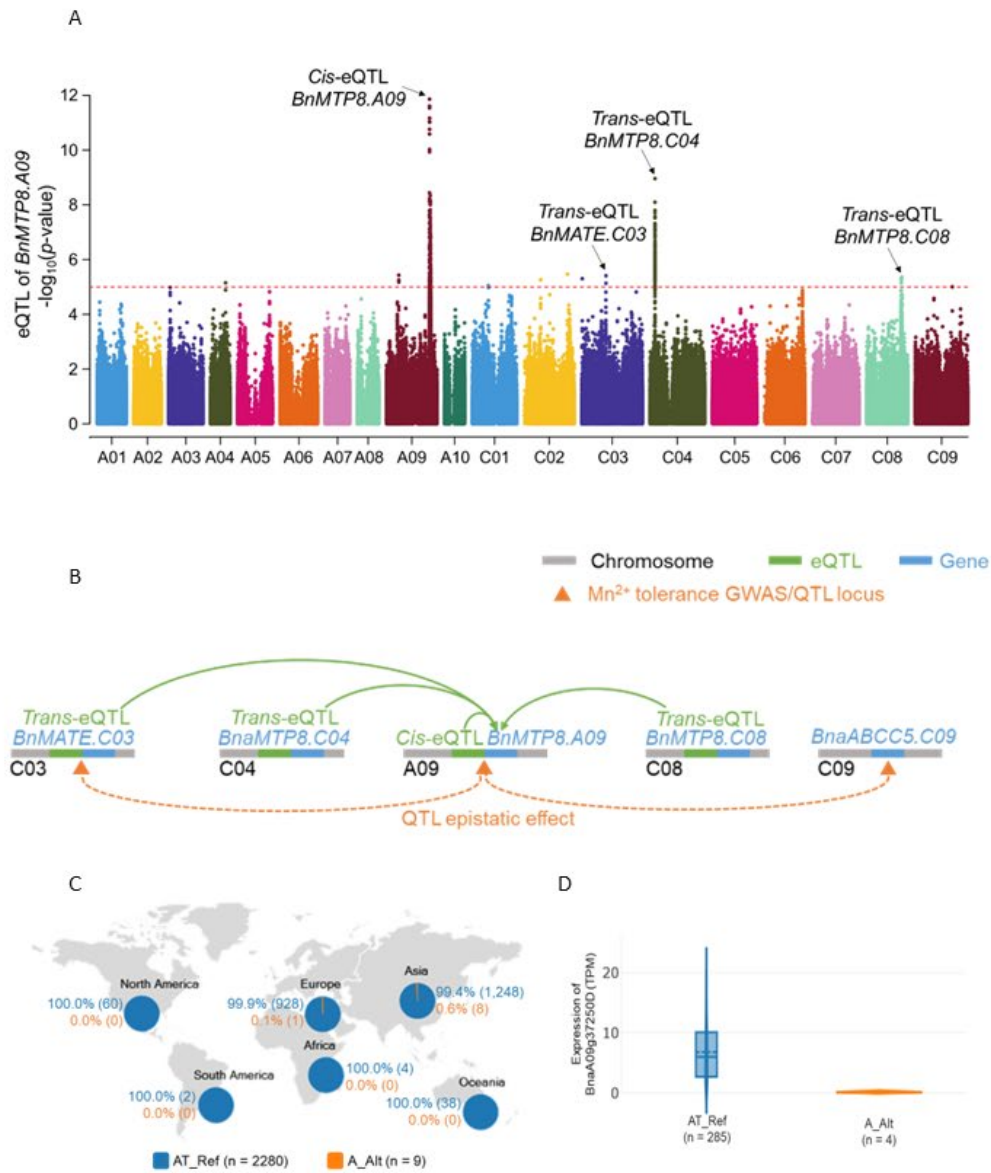

Figure 7

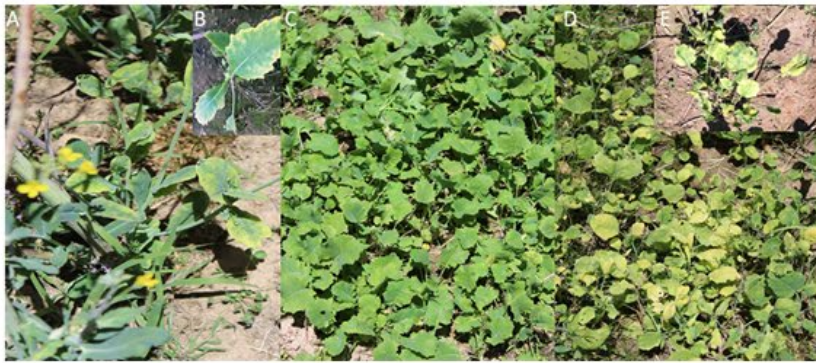

**Figure 8**
